# Supplementary material for: A transition metal-free approach towards the regioselective synthesis of β-carboline tethered pyrroles and 2,3-dihydro-1H-pyrroles
Source: Royal Society of Chemistry journal article supplement (doi:10.1039/d0nj02315a), 2020-01-01
Supplement: d0nj02315a1.pdf [file d0nj02315a1.pdf]

## Transition Metal-free Approach towards Regioselective Synthesis of $\beta$ -Carboline C-1 Tethered 2, 3-dihydro-1*H*-pyrroles & Pyrroles

Manpreet Singh<sup>a</sup>, Avijit Kumar Paul<sup>b</sup> and Virender Singh<sup>ac\*</sup>

<sup>a</sup>Department of Chemistry, Dr B R Ambedkar National Institute of Technology (NIT) Jalandhar, 144011, Punjab, India.

<sup>b</sup>Department of Chemistry, National Institute of Technology Kurukshetra, 136119, Haryana, India.

<sup>c</sup>Department of Chemistry, Central University of Punjab, Bathinda, 151001, Punjab, India

E mail:- singhv@nitj.ac.in; virender.singh@cup.edu.in; (+) 91-9780998060

### Supporting Information

#### Table of Contents

|           |                                                                         |             |
|-----------|-------------------------------------------------------------------------|-------------|
| <b>1.</b> | <b>Synthesis of 1-formyl-<math>\beta</math>-carboline derivatives</b>   | <b>2</b>    |
| <b>2.</b> | <b>X-ray Crystallographic Data of 1aA</b>                               | <b>3-5</b>  |
| <b>3.</b> | <b><sup>1</sup>H-NMR and <sup>13</sup>C-NMR spectra of new products</b> | <b>6-39</b> |

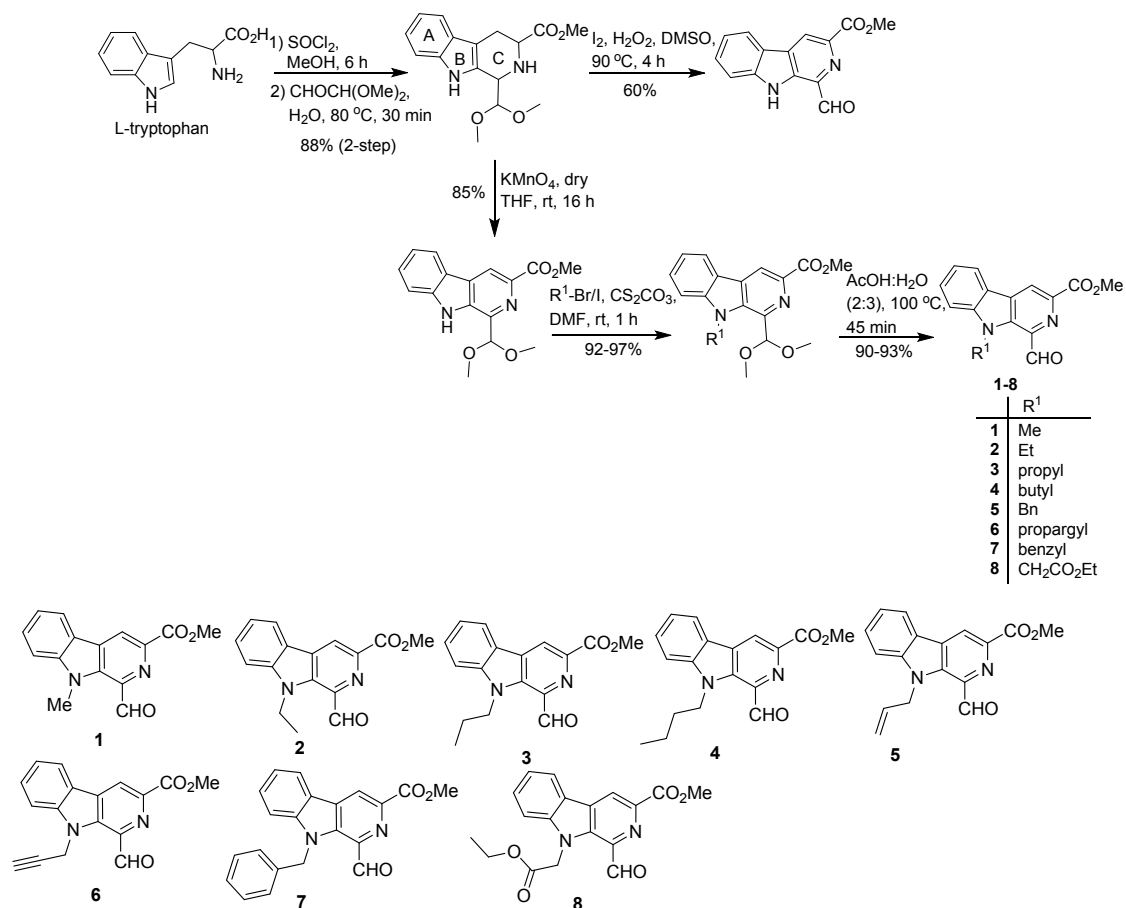

**Scheme S1.** Synthesis of 1-formyl-9H-pyrido[3,4-b]indole derivatives<sup>21</sup>

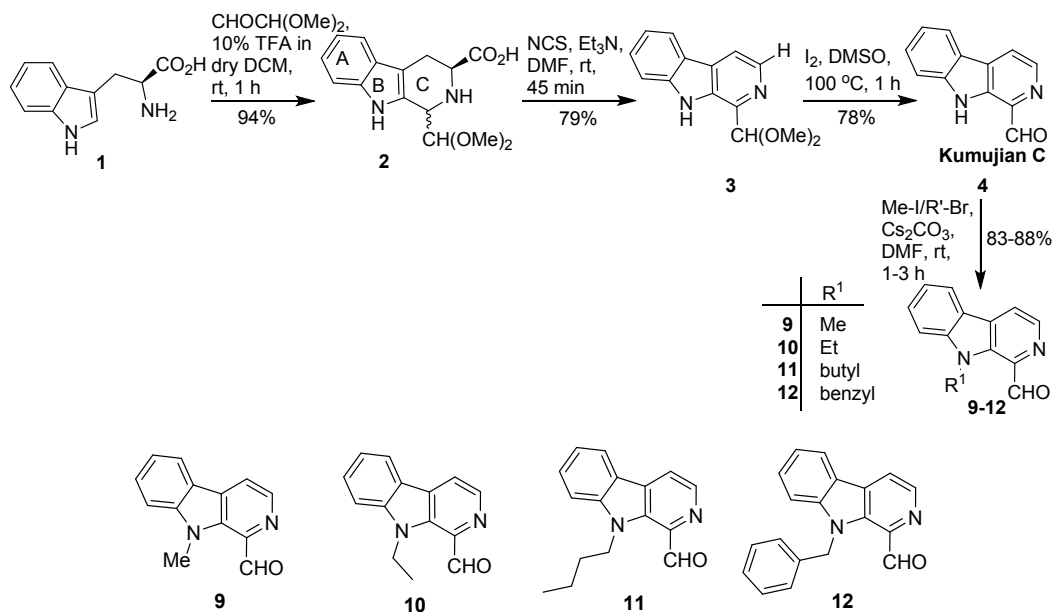

**Scheme S2.** Synthesis of Kumujian C and its derivative<sup>21</sup>

**Reference:**

(21) M. Singh, P. Awasthi and V. Singh, *Eur. J. Org. Chem.*, 2020, **2020**, 1023-1041.

**Table 1:** Description of crystal data and structure refinement parameters

| Parameters                                                                                                                                                                                                                                  | 1aA                                                           |
|---------------------------------------------------------------------------------------------------------------------------------------------------------------------------------------------------------------------------------------------|---------------------------------------------------------------|
| Empirical formula                                                                                                                                                                                                                           | C <sub>28</sub> H <sub>25</sub> N <sub>3</sub> O <sub>5</sub> |
| Formula mass                                                                                                                                                                                                                                | 483.51                                                        |
| Crystal system                                                                                                                                                                                                                              | Monoclinic                                                    |
| Space group                                                                                                                                                                                                                                 | <i>P</i> 2 <sub>1</sub> / <i>n</i>                            |
| a (Å)                                                                                                                                                                                                                                       | 12.9292(12)                                                   |
| b (Å)                                                                                                                                                                                                                                       | 10.5655(10)                                                   |
| c (Å)                                                                                                                                                                                                                                       | 17.6719(16)                                                   |
| α (°)                                                                                                                                                                                                                                       | 90.000                                                        |
| β (°)                                                                                                                                                                                                                                       | 92.537(2)                                                     |
| γ (°)                                                                                                                                                                                                                                       | 90.000                                                        |
| V (Å <sup>3</sup> )                                                                                                                                                                                                                         | 2411.7(4)                                                     |
| Z                                                                                                                                                                                                                                           | 4                                                             |
| T/K                                                                                                                                                                                                                                         | 296(2)                                                        |
| ρ (g cm <sup>-3</sup> )                                                                                                                                                                                                                     | 1.332                                                         |
| μ(mm <sup>-1</sup> )                                                                                                                                                                                                                        | 0.093                                                         |
| λ (Mo Kα) (Å)                                                                                                                                                                                                                               | 0.71073                                                       |
| θ min (°)                                                                                                                                                                                                                                   | 3.01                                                          |
| θ max (°)                                                                                                                                                                                                                                   | 25.00                                                         |
| Total data                                                                                                                                                                                                                                  | 23039                                                         |
| Unique data                                                                                                                                                                                                                                 | 4205                                                          |
| Rint                                                                                                                                                                                                                                        | 0.0739                                                        |
| R indexes [ <i>I</i> >2σ( <i>I</i> )]                                                                                                                                                                                                       | R <sub>1</sub> = 0.0608<br>wR <sub>2</sub> = 0.1475           |
| R indexes (all data)                                                                                                                                                                                                                        | R <sub>1</sub> = 0.1294<br>wR <sub>2</sub> = 0.1746           |
| CCDC numbers                                                                                                                                                                                                                                | 1996773                                                       |
| F(000)                                                                                                                                                                                                                                      | 1016                                                          |
| GOF on F <sup>2</sup>                                                                                                                                                                                                                       | 0.925                                                         |
| <sup>a</sup> R <sub>1</sub> = $\sum   F_o  -  F_c   / \sum  F_o $ ; <sup>b</sup> wR <sub>2</sub> = $[\sum w(F_o^2 - F_c^2)^2 / \sum w(F_o^2)^2]^{1/2}$ ,<br>$w = 1/[\sigma^2(F_o)^2 + (aP)^2 + bP]$ . $P = [\max(F_o^2, 0) + 2(F_c^2)]/3$ ; |                                                               |

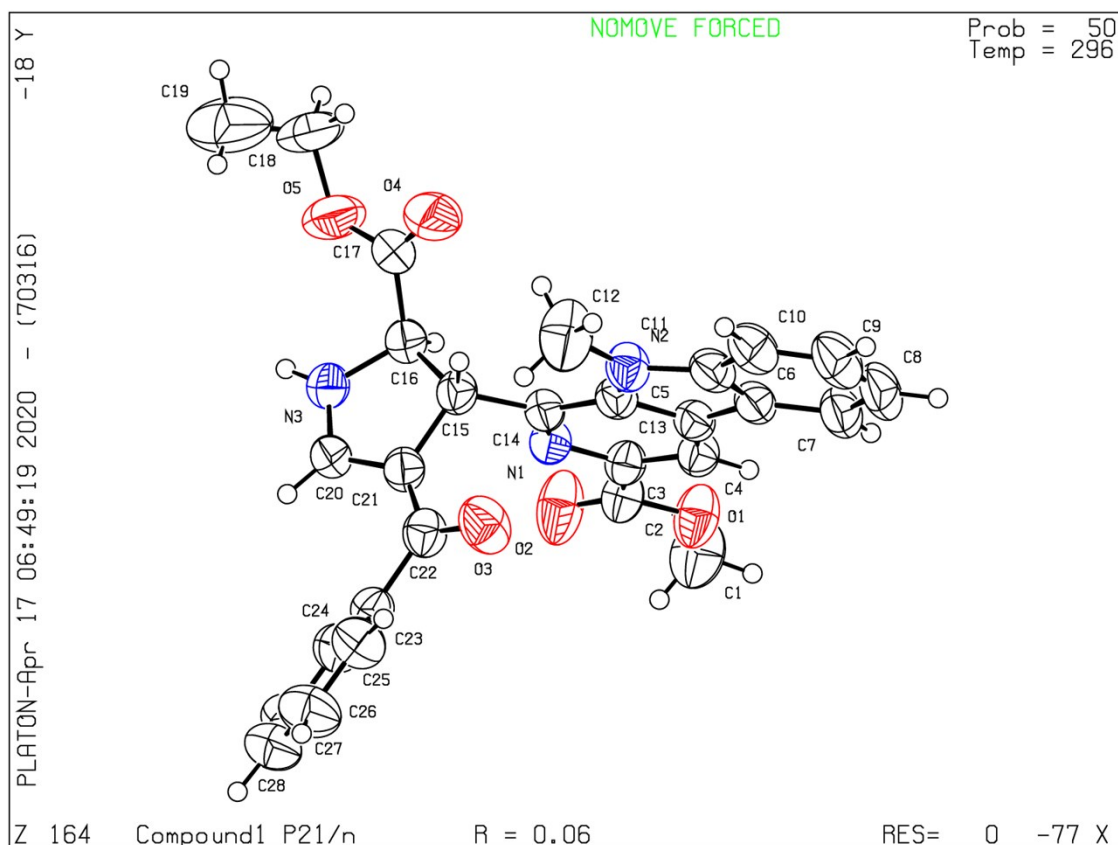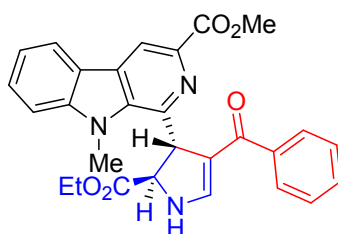

**Figure S3. X-ray crystallographic analysis of 1aA.**

Recrystallized from DCM/MeOH/THF (V/V/V = 1/1/1). Further information can be found in the CIF file. This crystal was deposited in the Cambridge Crystallographic Data Centre and assigned as CCDC 1996773.

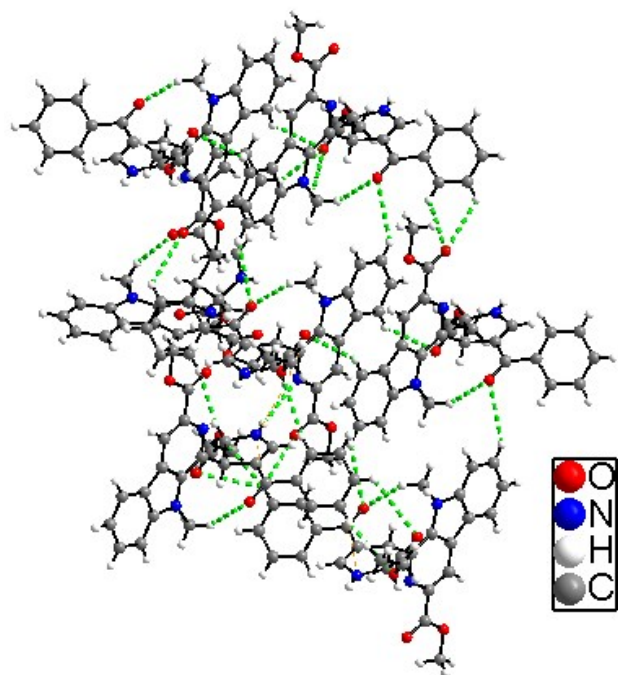

**Figure S4.** Packing diagram of **1aA** Green dotted lines correspond to intra- and inter-molecular hydrogen bonds (CCDC 1996773)

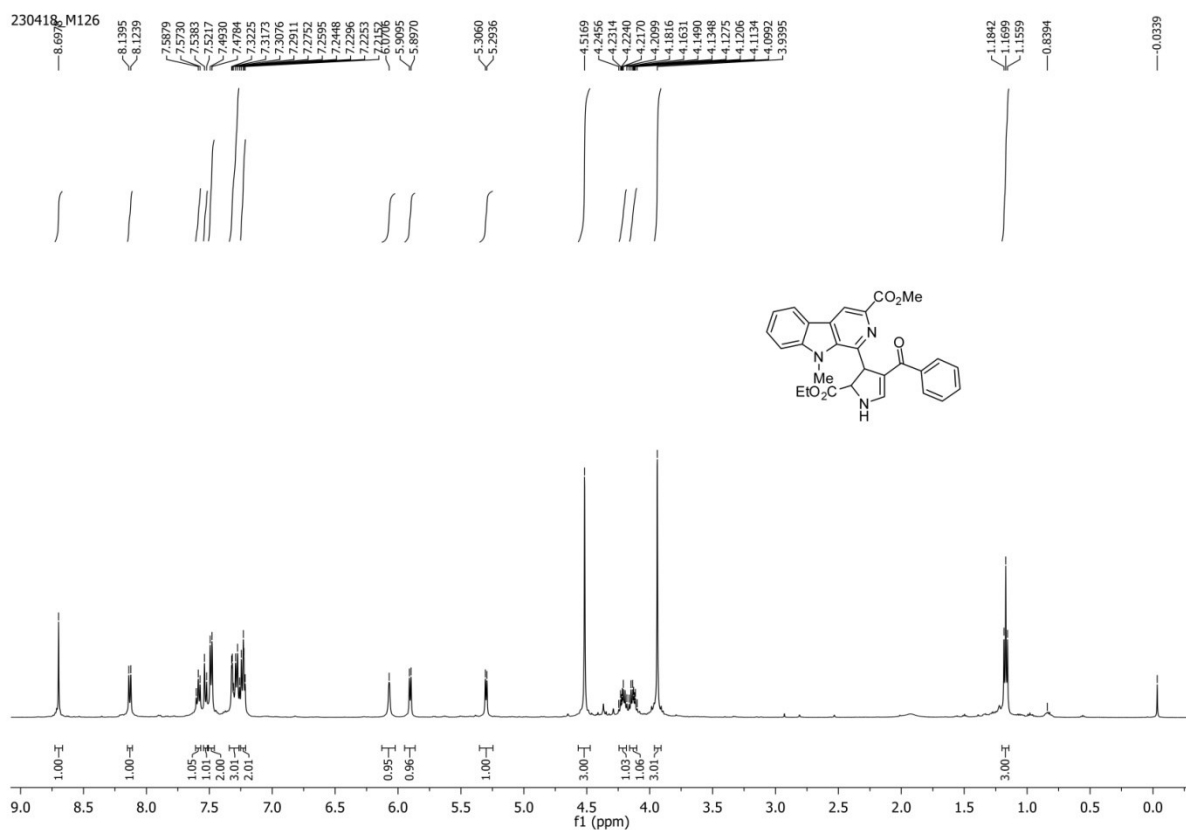

Figure S5. <sup>1</sup>H-NMR spectrum of **1aA** in CDCl<sub>3</sub>.

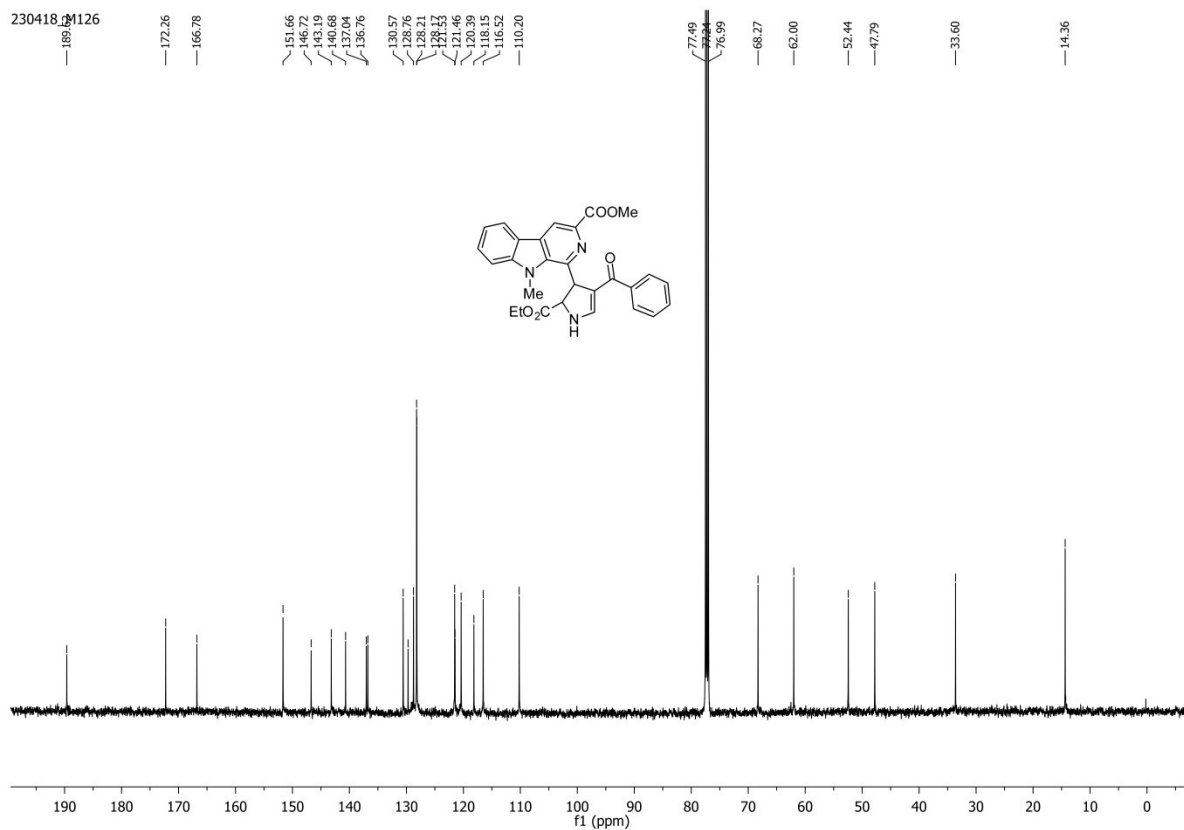

Figure S6. <sup>13</sup>C-NMR spectrum of **1aA** in CDCl<sub>3</sub>.

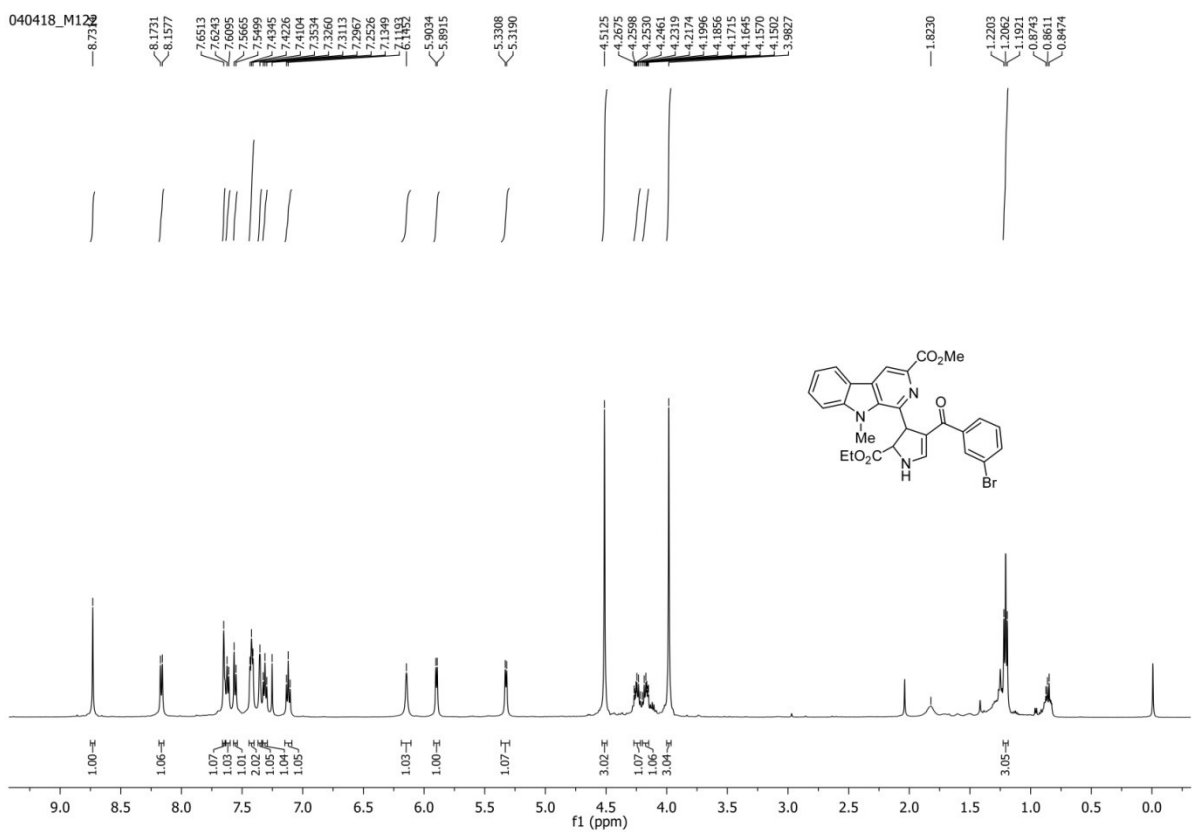

Figure S7. <sup>1</sup>H-NMR spectrum of **1aB** in CDCl<sub>3</sub>.

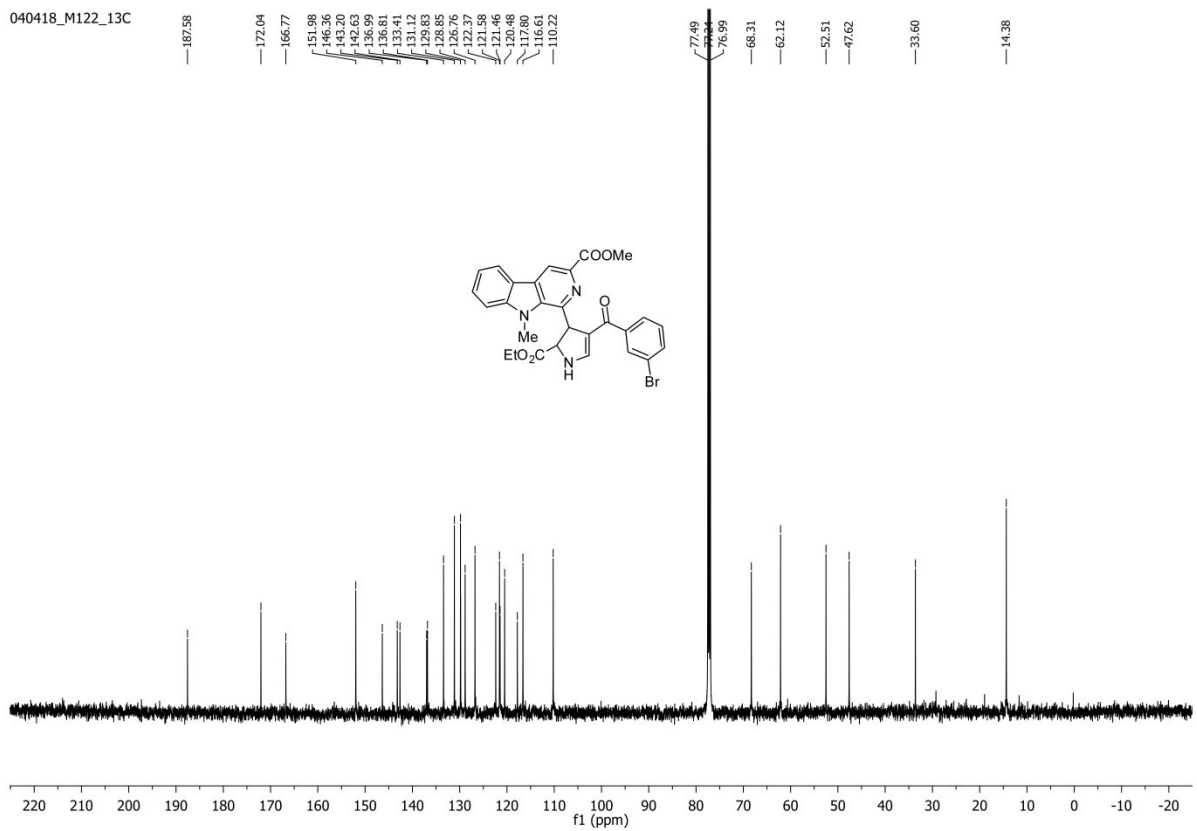

Figure S8. <sup>13</sup>C-NMR spectrum of **1aB** in CDCl<sub>3</sub>.

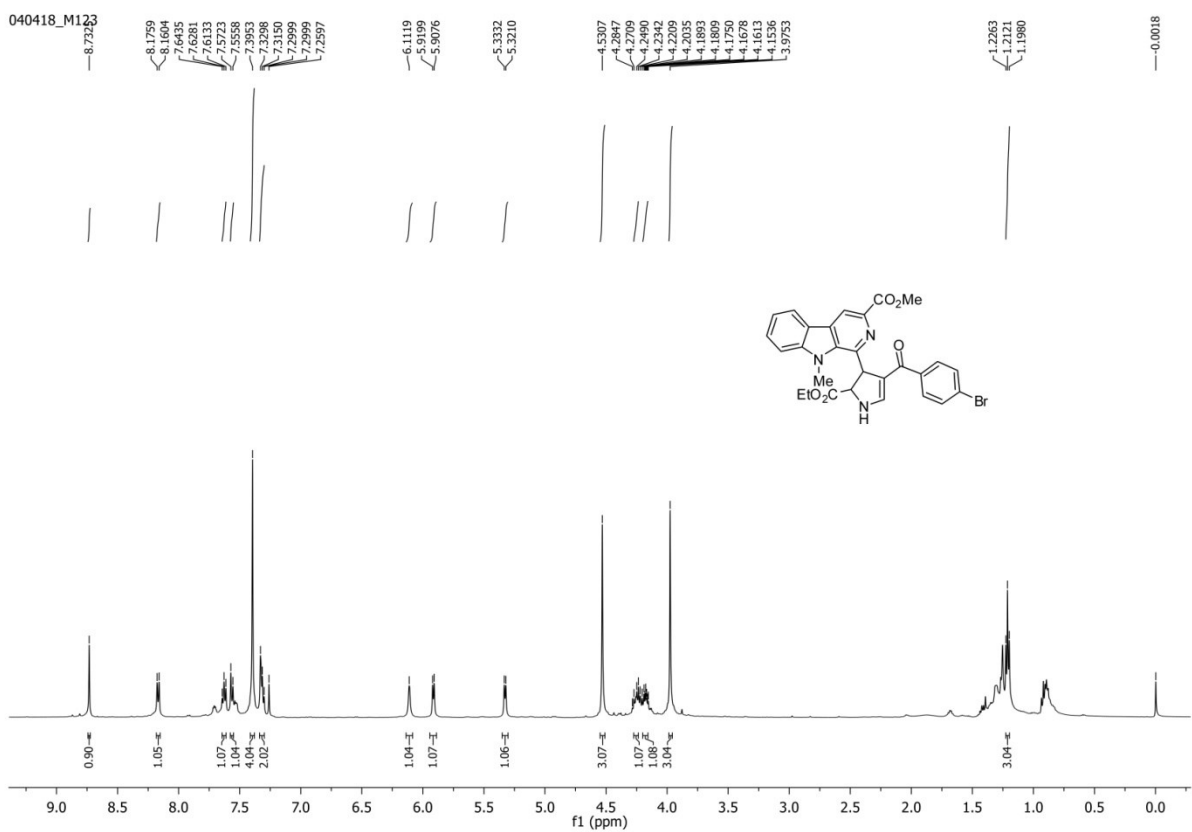

Figure S9.  $^1\text{H-NMR}$  spectrum of **1aC** in  $\text{CDCl}_3$ .

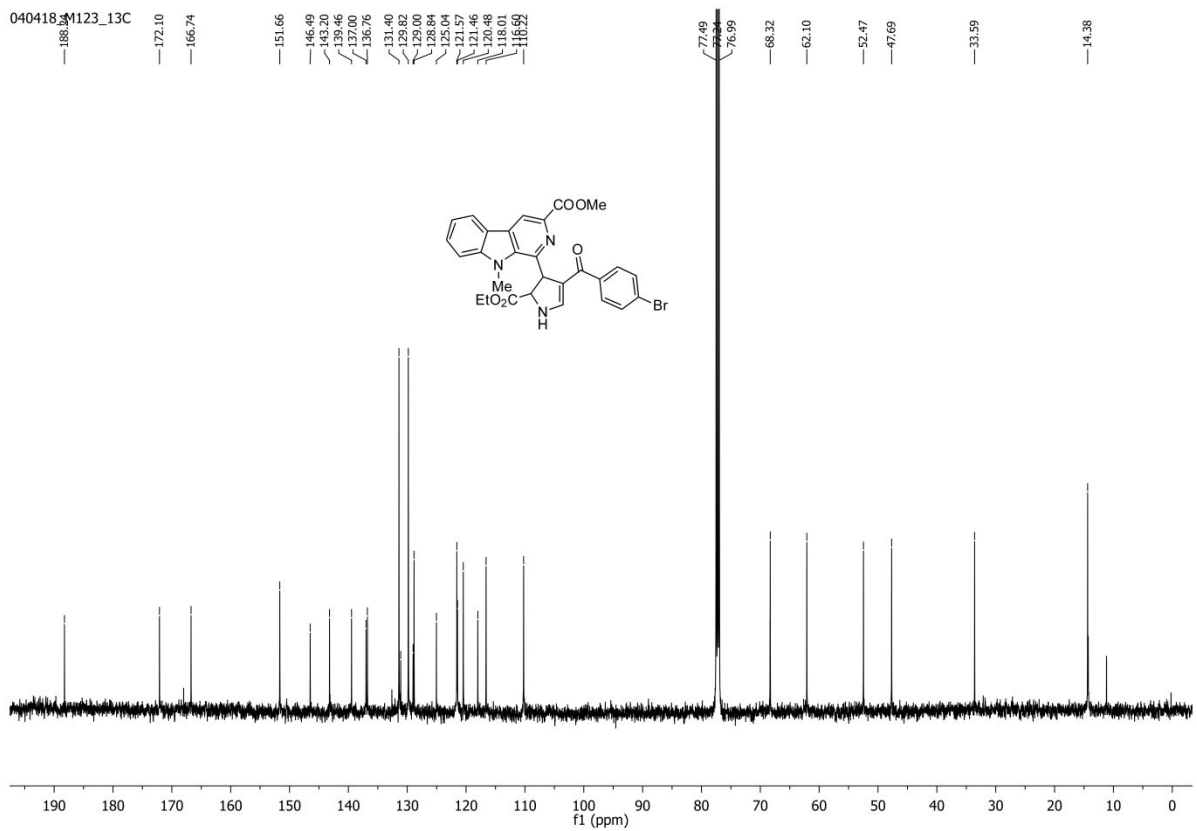

Figure S10.  $^{13}\text{C-NMR}$  spectrum of **1aC** in  $\text{CDCl}_3$ .



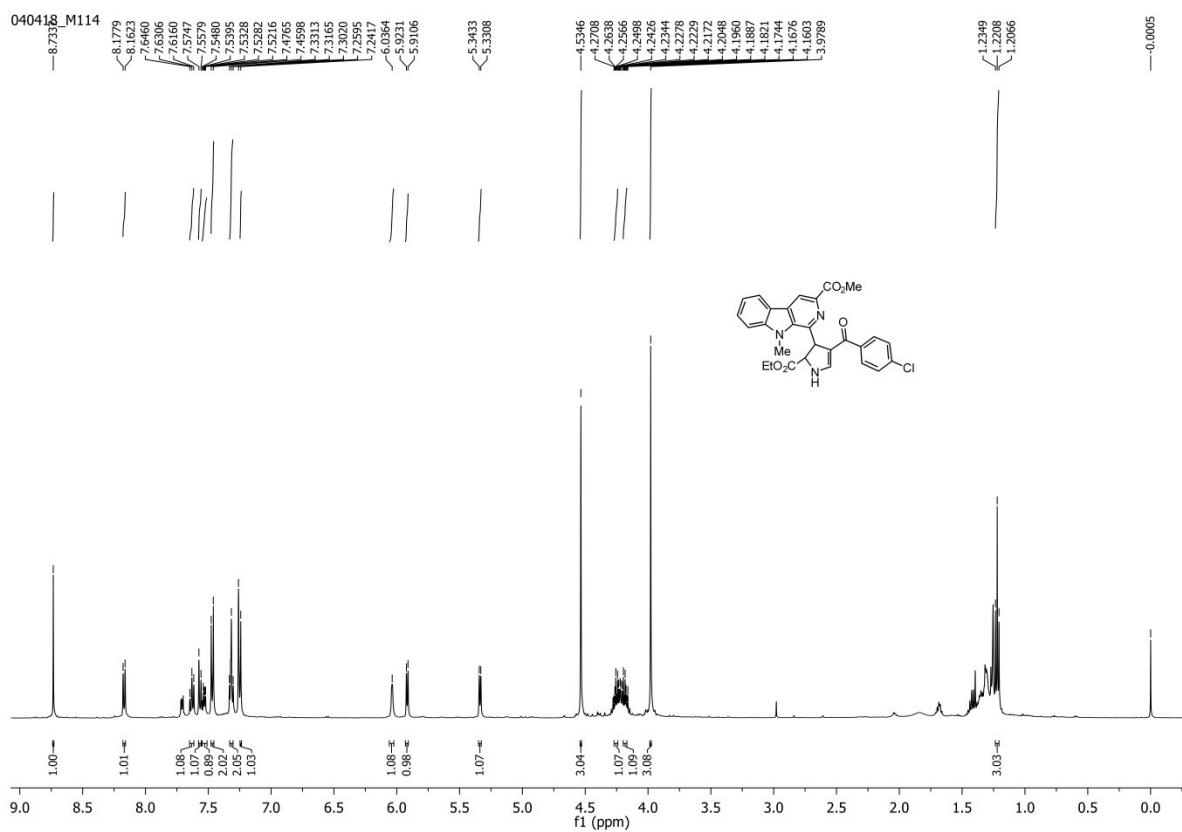

Figure S11.  $^1\text{H-NMR}$  spectrum of **1aD** in  $\text{CDCl}_3$ .

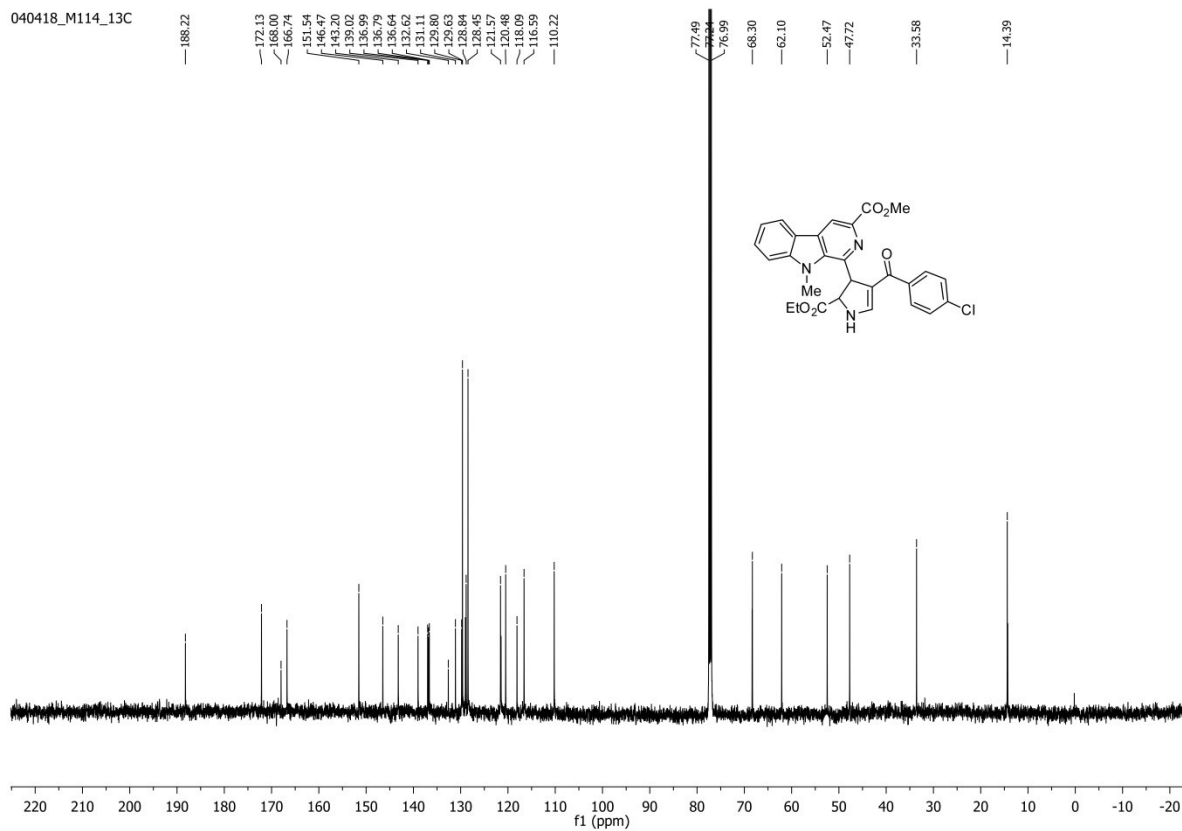

Figure S12.  $^{13}\text{C-NMR}$  spectrum of **1aD** in  $\text{CDCl}_3$ .

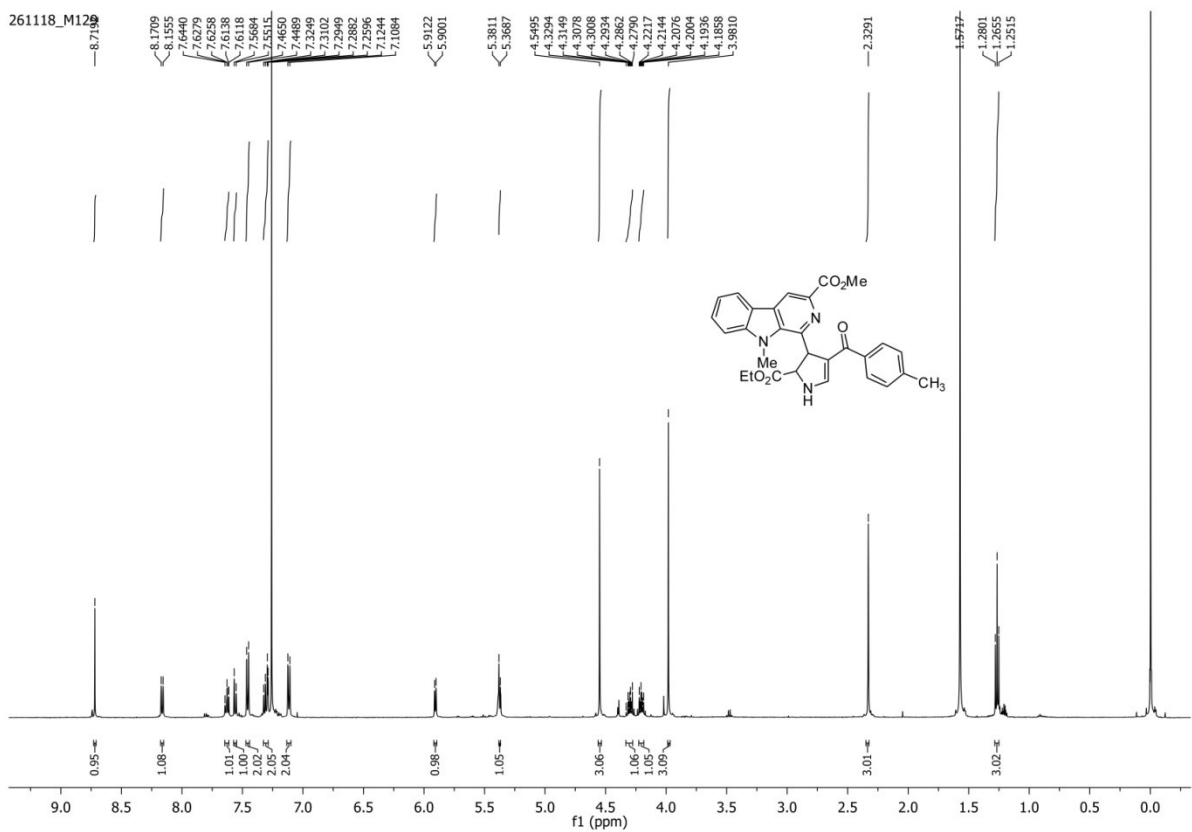

Figure S13. <sup>1</sup>H-NMR spectrum of **1aE** in CDCl<sub>3</sub>.

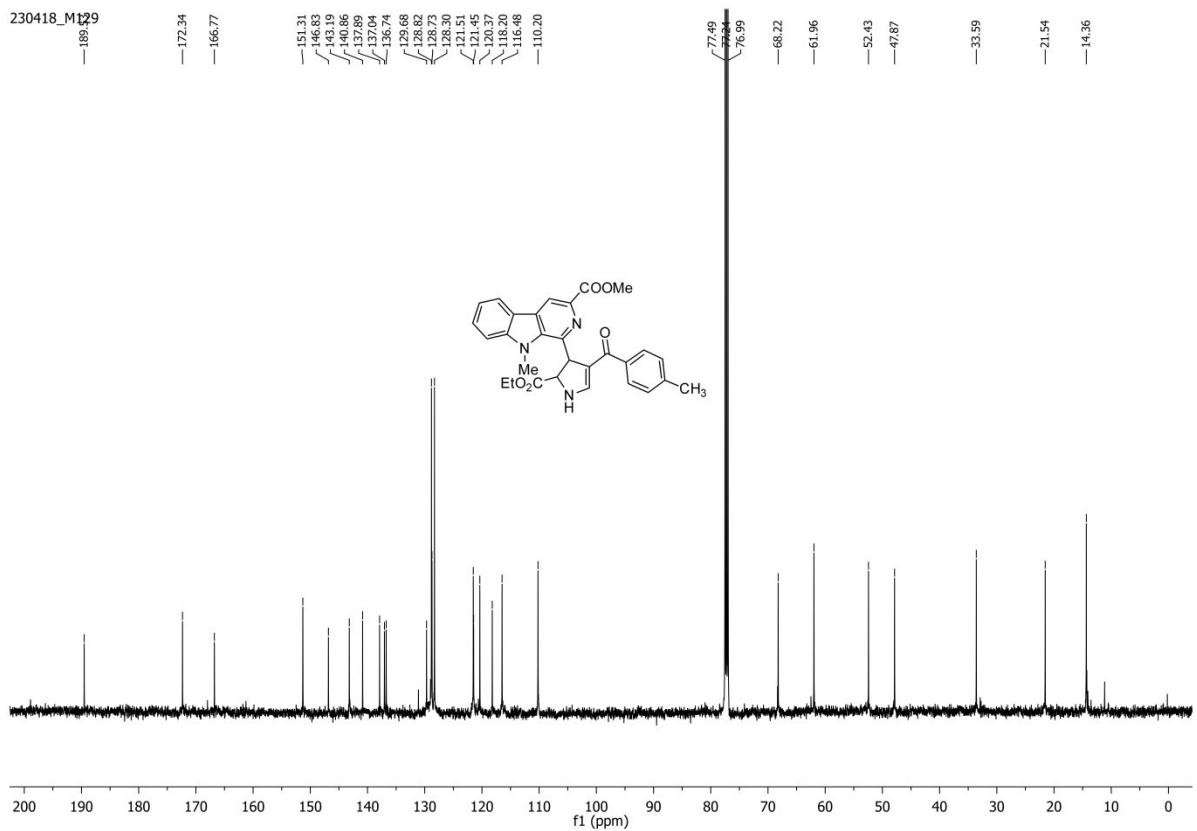

Figure S14. <sup>13</sup>C-NMR spectrum of **1aE** in CDCl<sub>3</sub>.

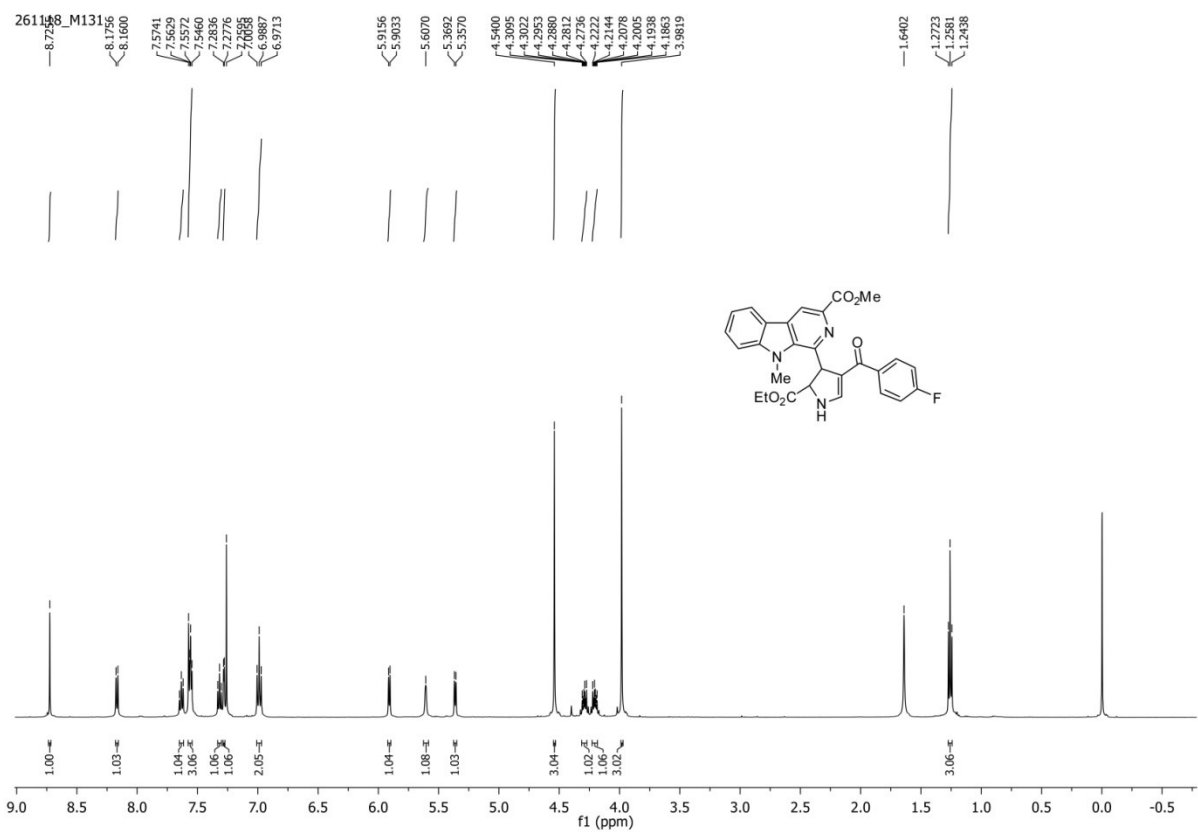

Figure S15. <sup>1</sup>H-NMR spectrum of **1aF** in CDCl<sub>3</sub>.

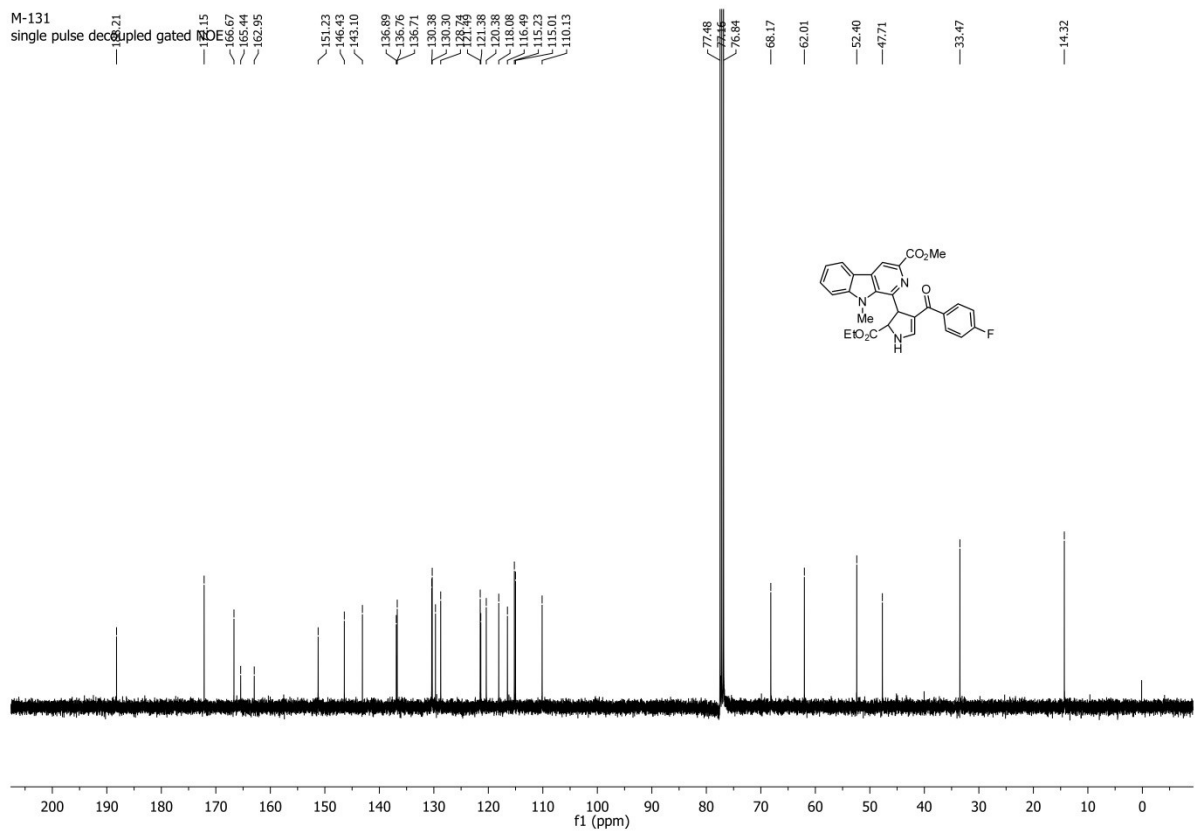

Figure S16. <sup>13</sup>C-NMR spectrum of **1aF** in CDCl<sub>3</sub>.

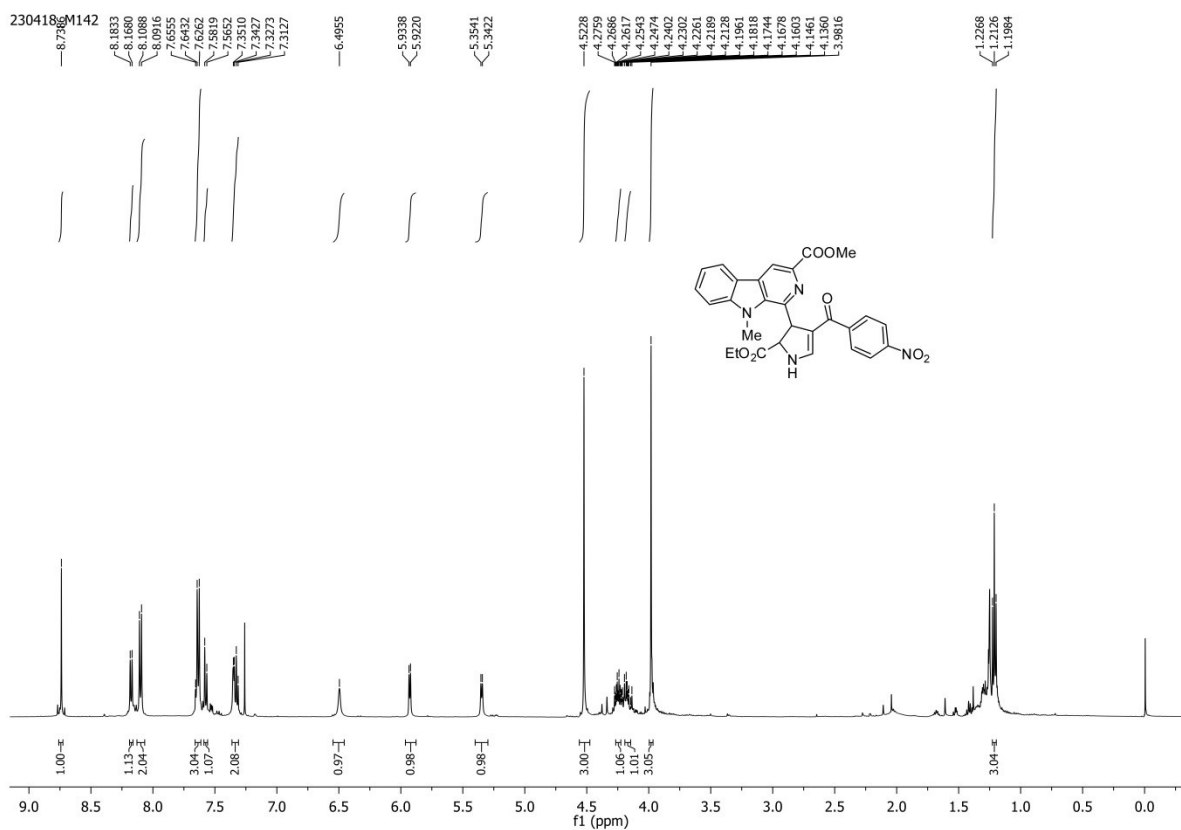

Figure S17. <sup>1</sup>H-NMR spectrum of **1aG** in CDCl<sub>3</sub>.

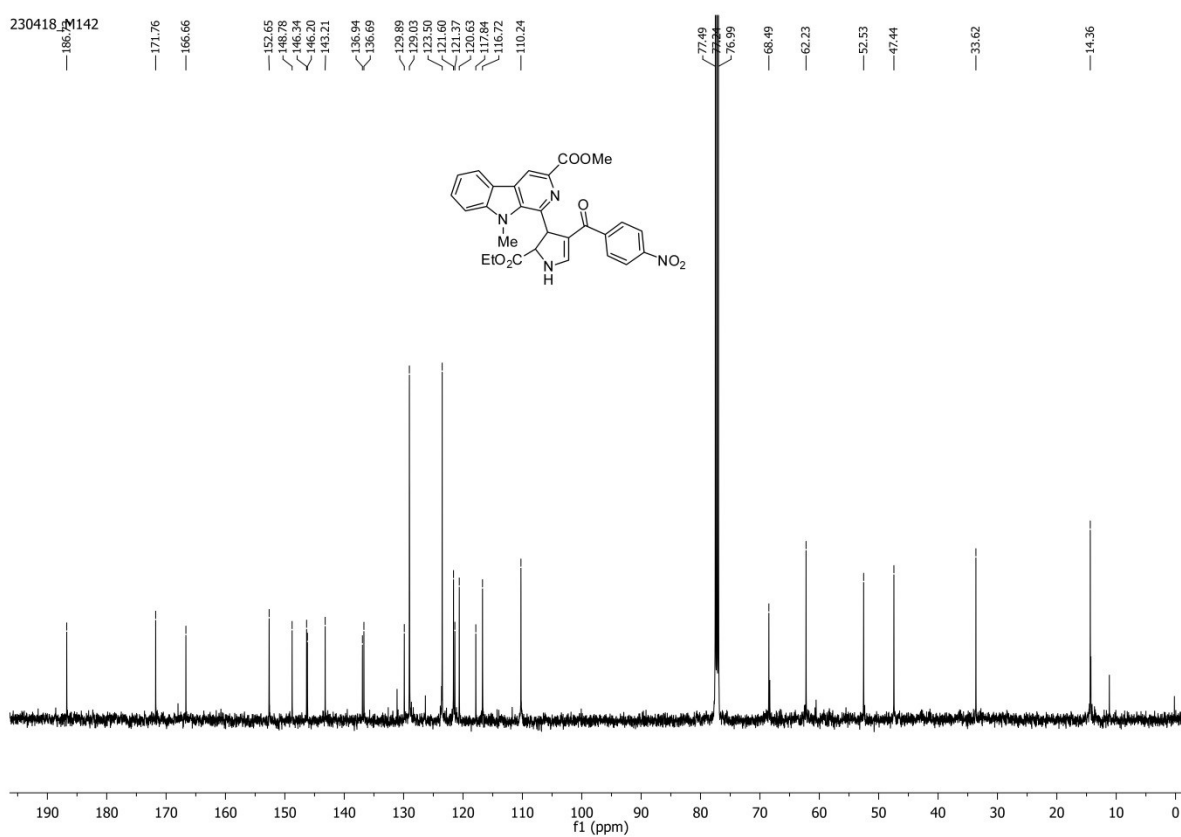

Figure S18. <sup>13</sup>C-NMR spectrum of **1aG** in CDCl<sub>3</sub>.

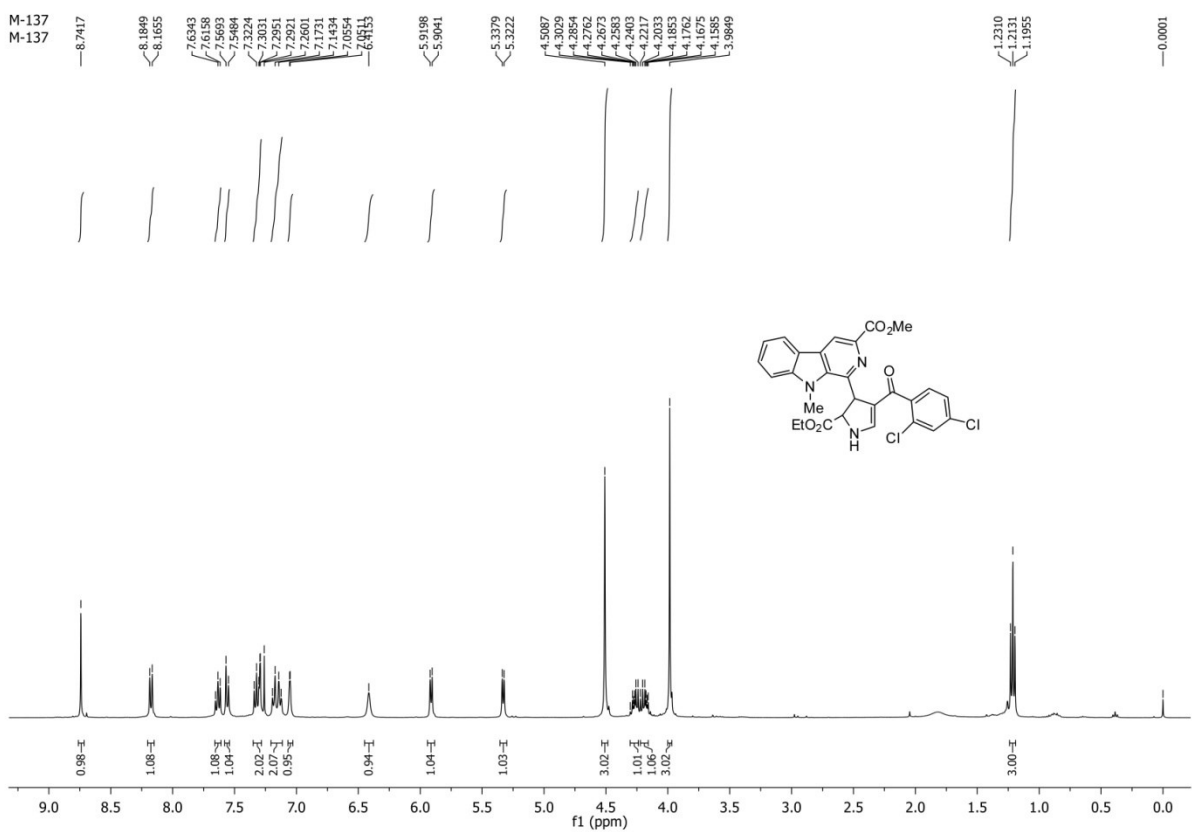

Figure S19.  $^1\text{H-NMR}$  spectrum of **1aH** in  $\text{CDCl}_3$ .

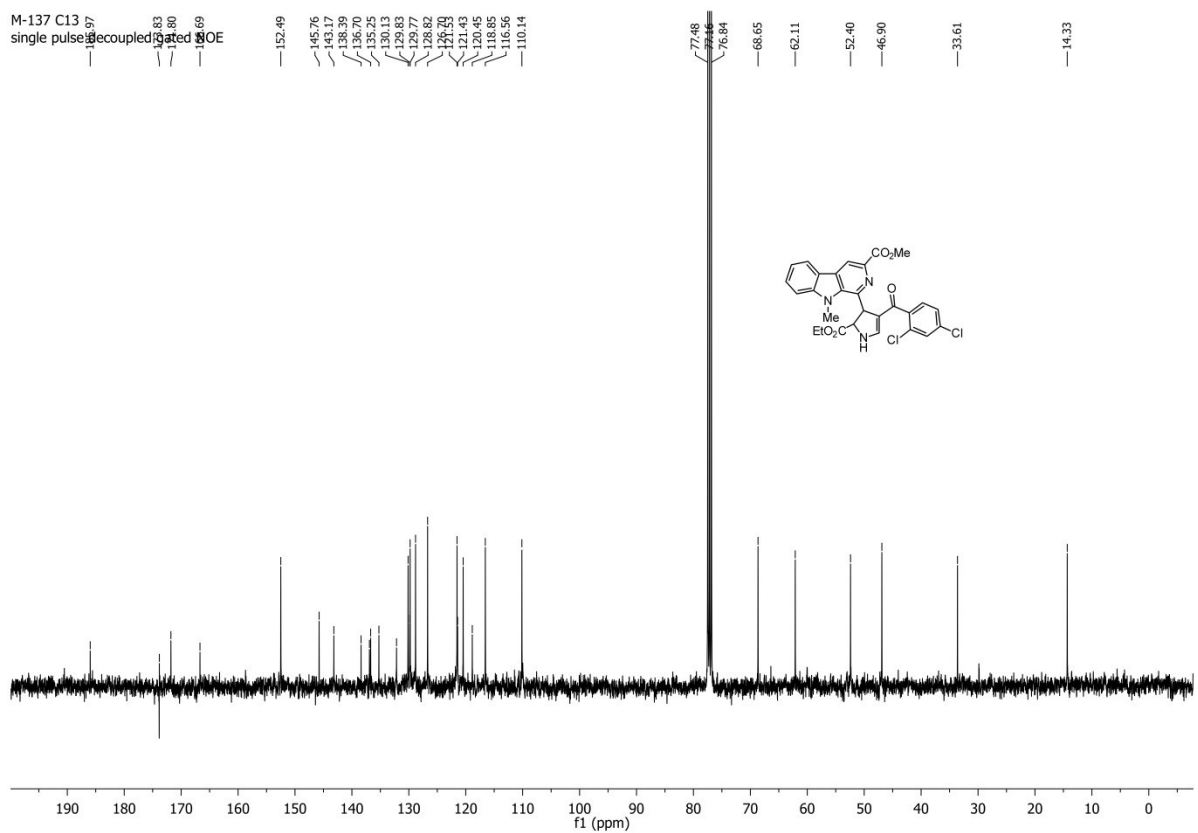

Figure S20.  $^{13}\text{C-NMR}$  spectrum of **1aH** in  $\text{CDCl}_3$ .

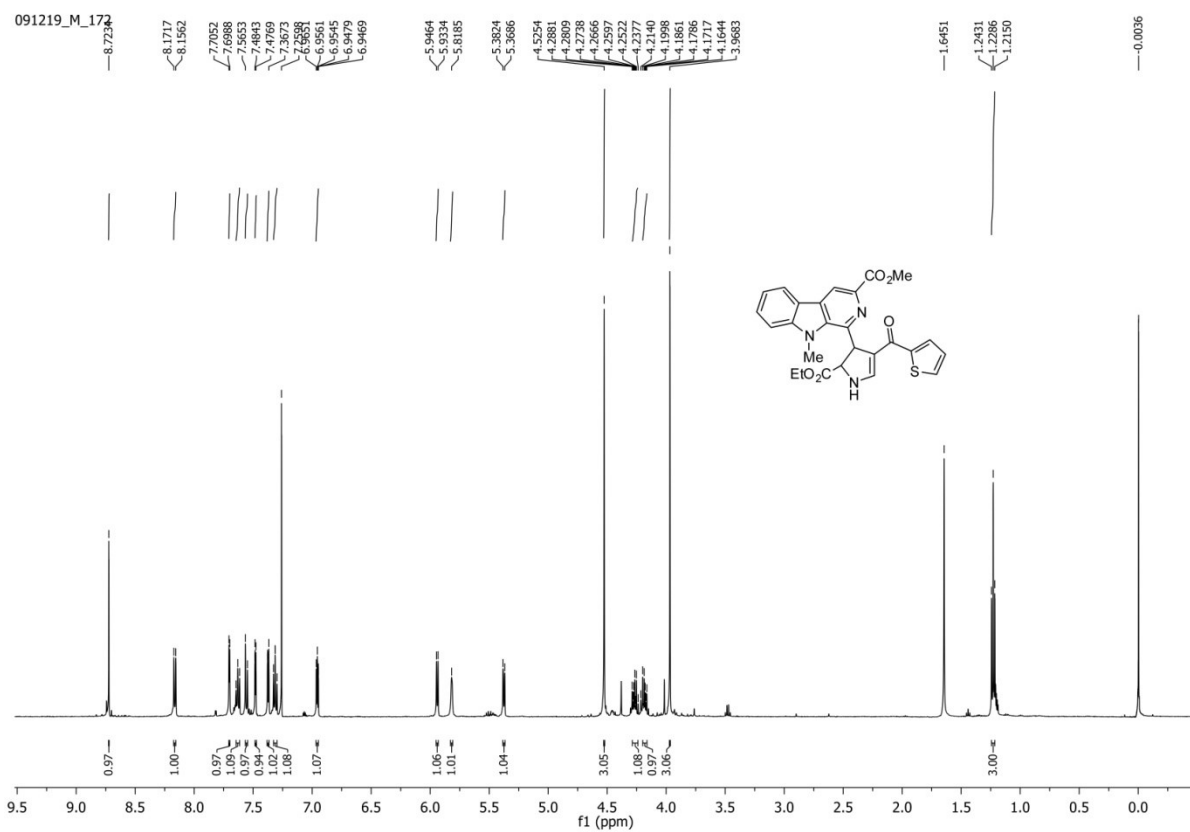

Figure S21. <sup>1</sup>H-NMR spectrum of **1aI** in CDCl<sub>3</sub>.

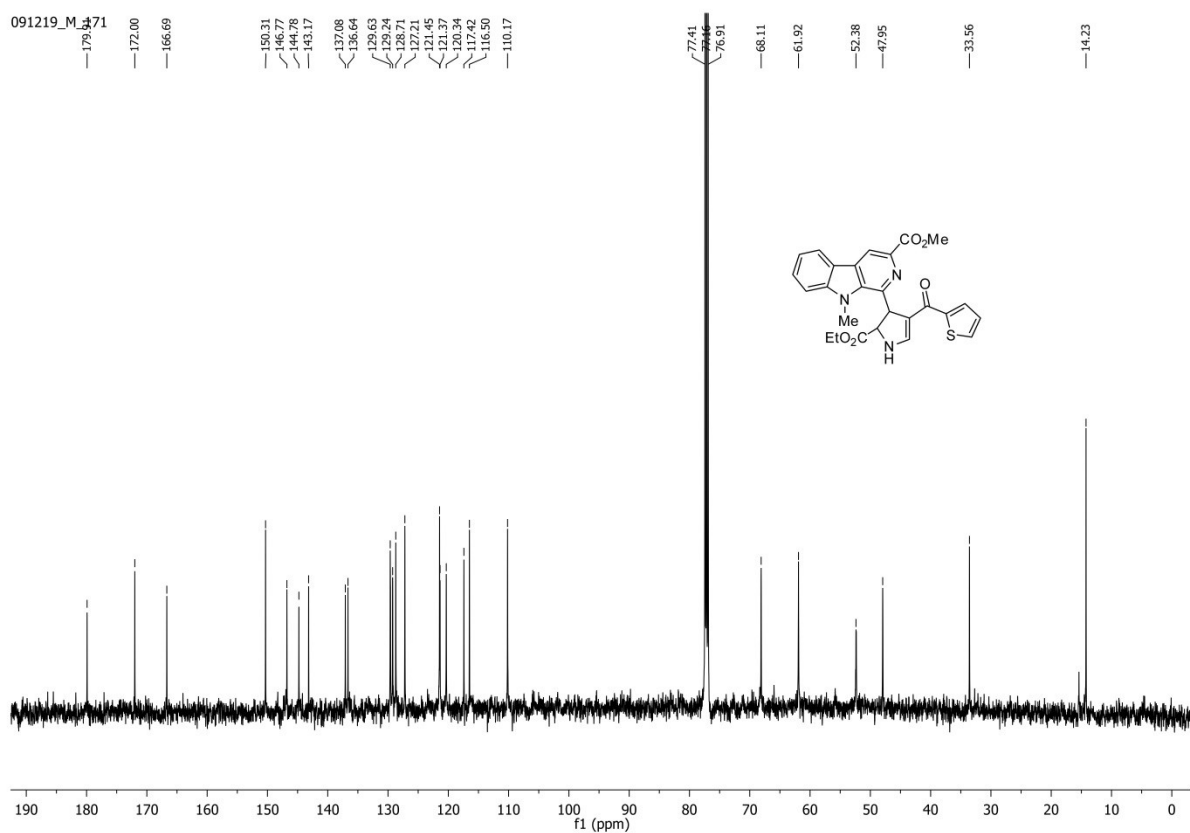

Figure S22. <sup>13</sup>C-NMR spectrum of **1aI** in CDCl<sub>3</sub>.

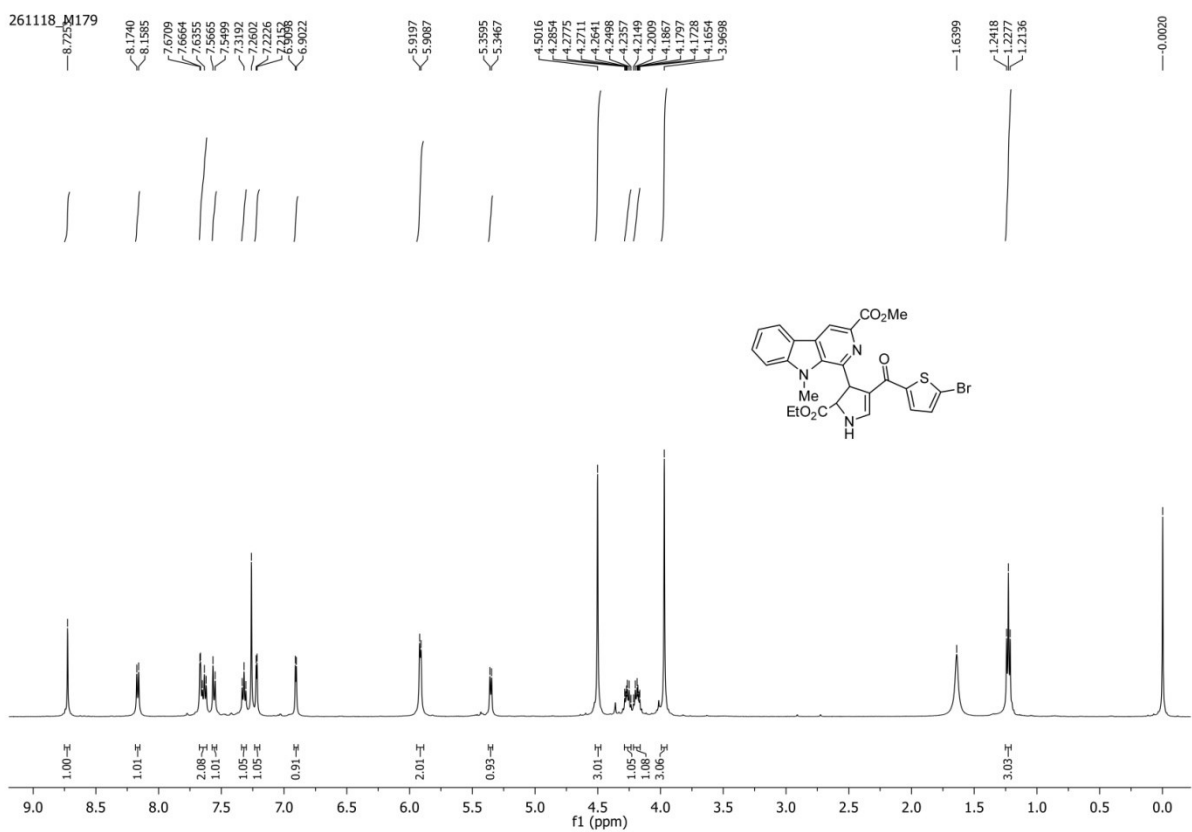

Figure S23.  $^1\text{H-NMR}$  spectrum of **1aJ** in  $\text{CDCl}_3$ .

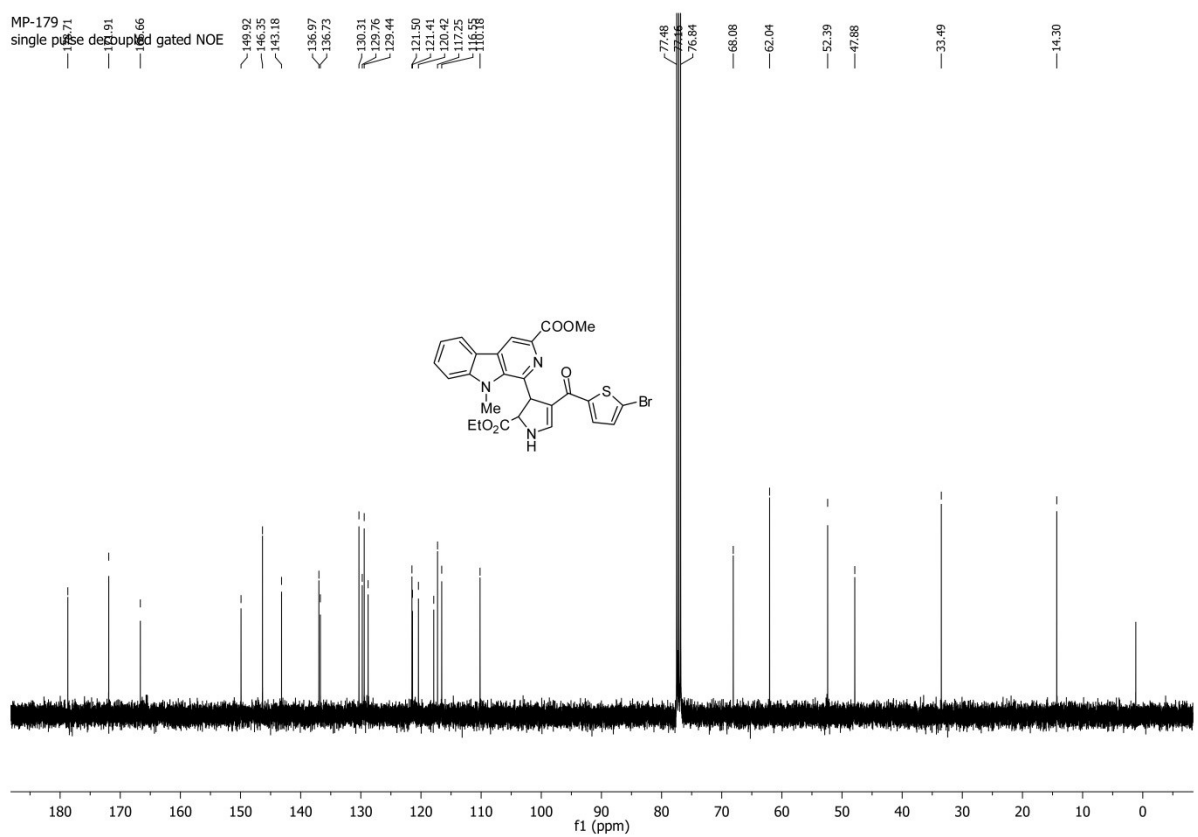

Figure S24.  $^{13}\text{C-NMR}$  spectrum of **1aJ** in  $\text{CDCl}_3$ .

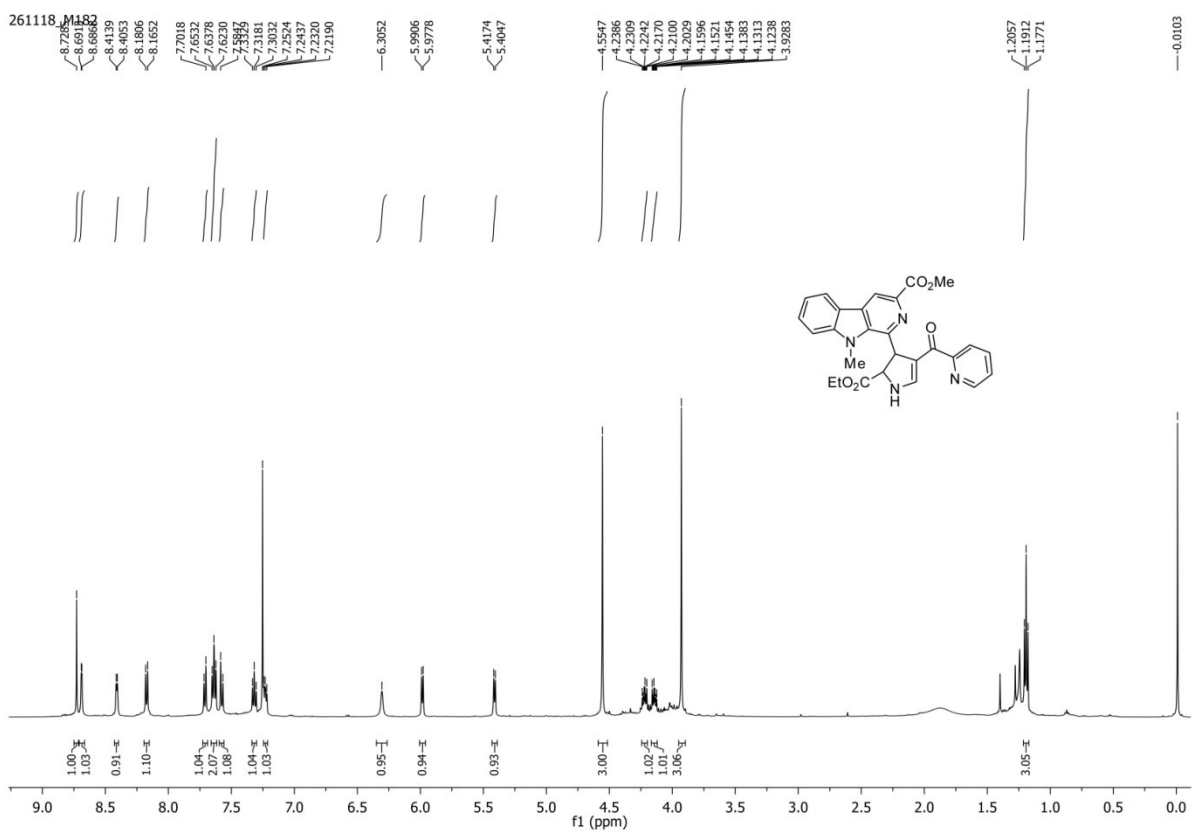

Figure S25. <sup>1</sup>H-NMR spectrum of **1aK** in CDCl<sub>3</sub>.

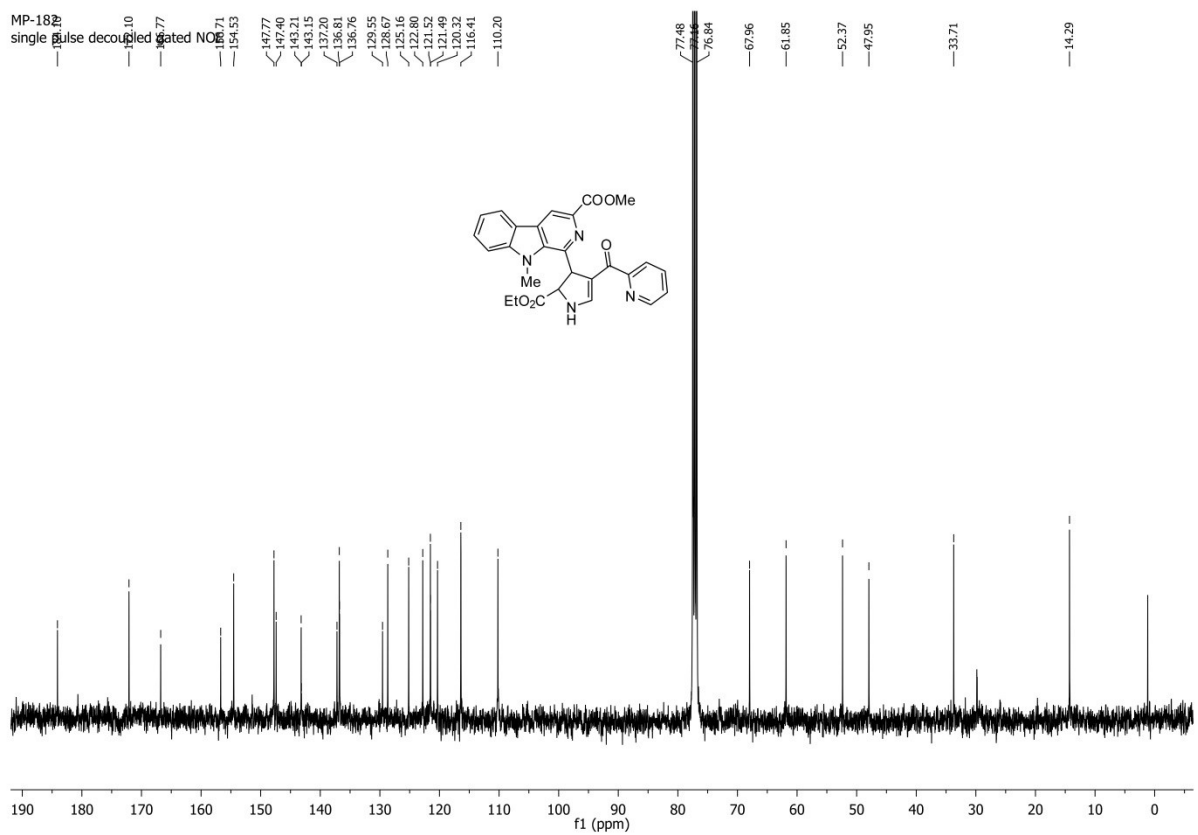

Figure S26. <sup>13</sup>C-NMR spectrum of **1aK** in CDCl<sub>3</sub>.



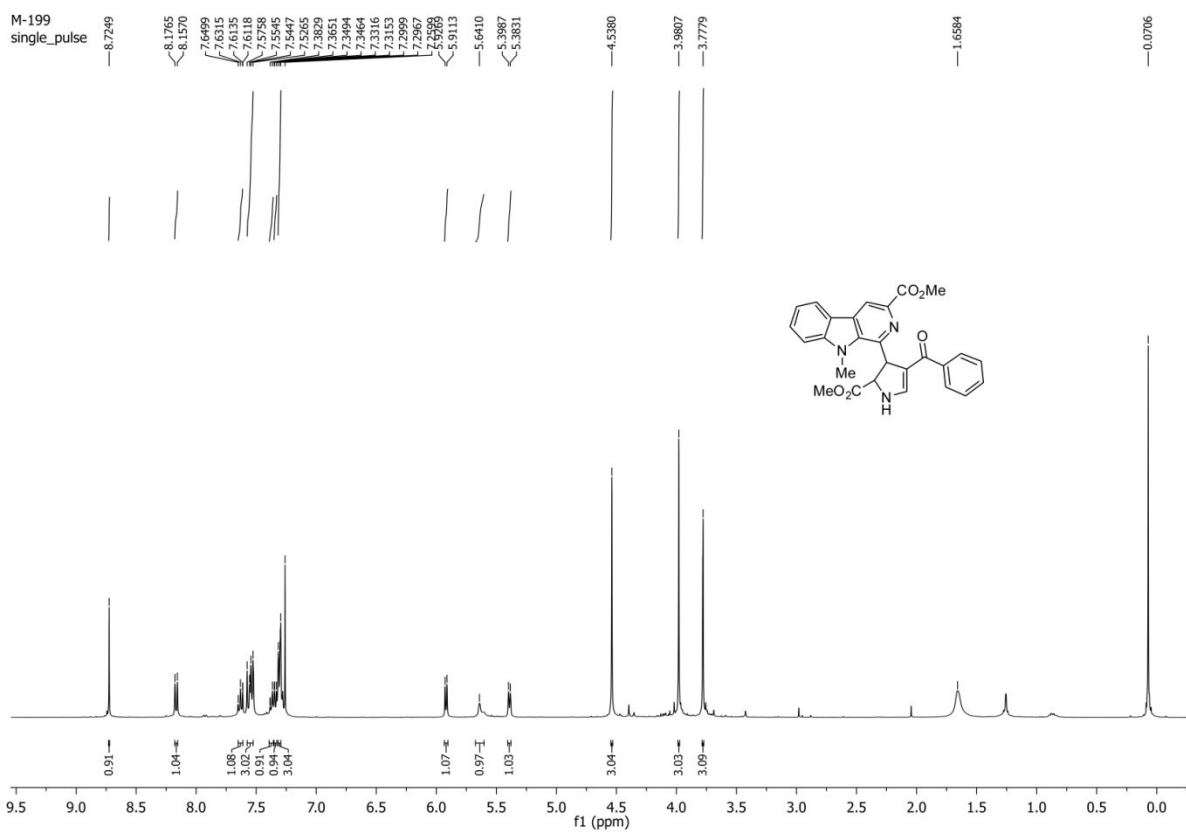

Figure S27.  $^1\text{H-NMR}$  spectrum of **1bA** in  $\text{CDCl}_3$ .

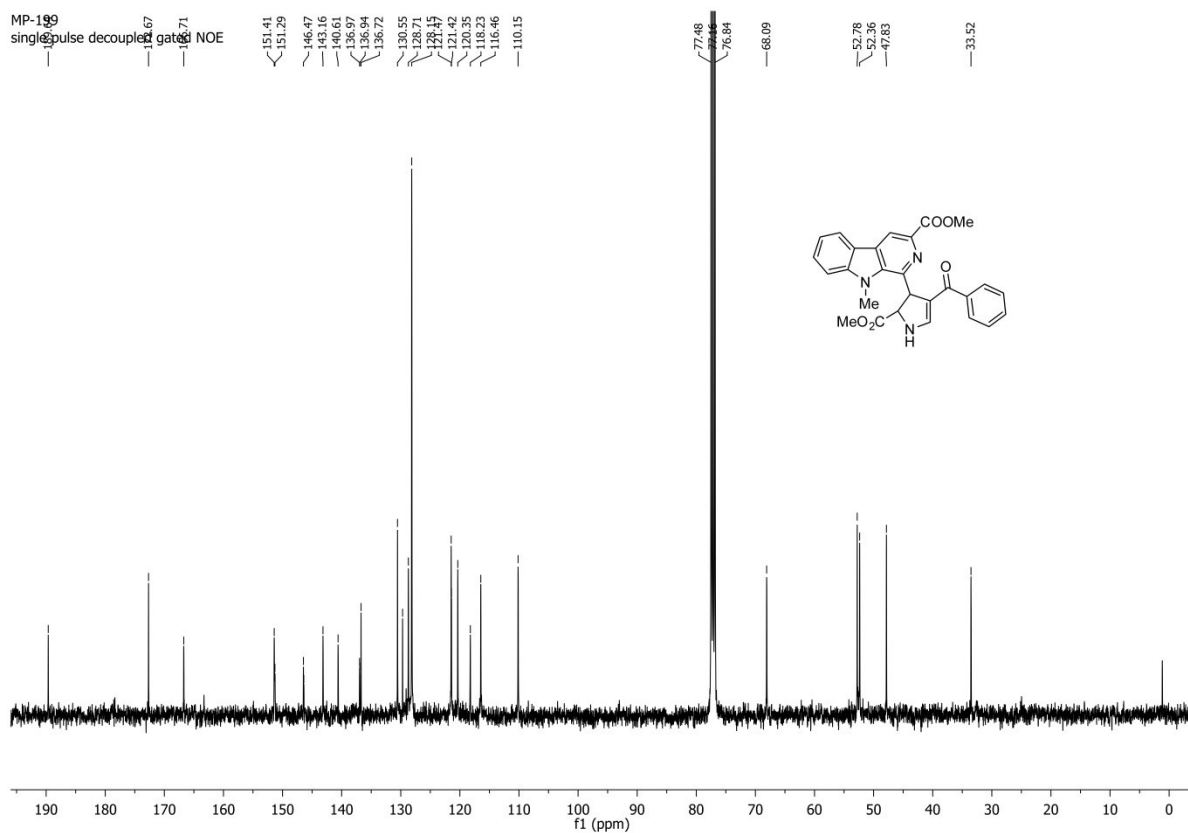

Figure S28.  $^{13}\text{C-NMR}$  spectrum of **1bA** in  $\text{CDCl}_3$ .

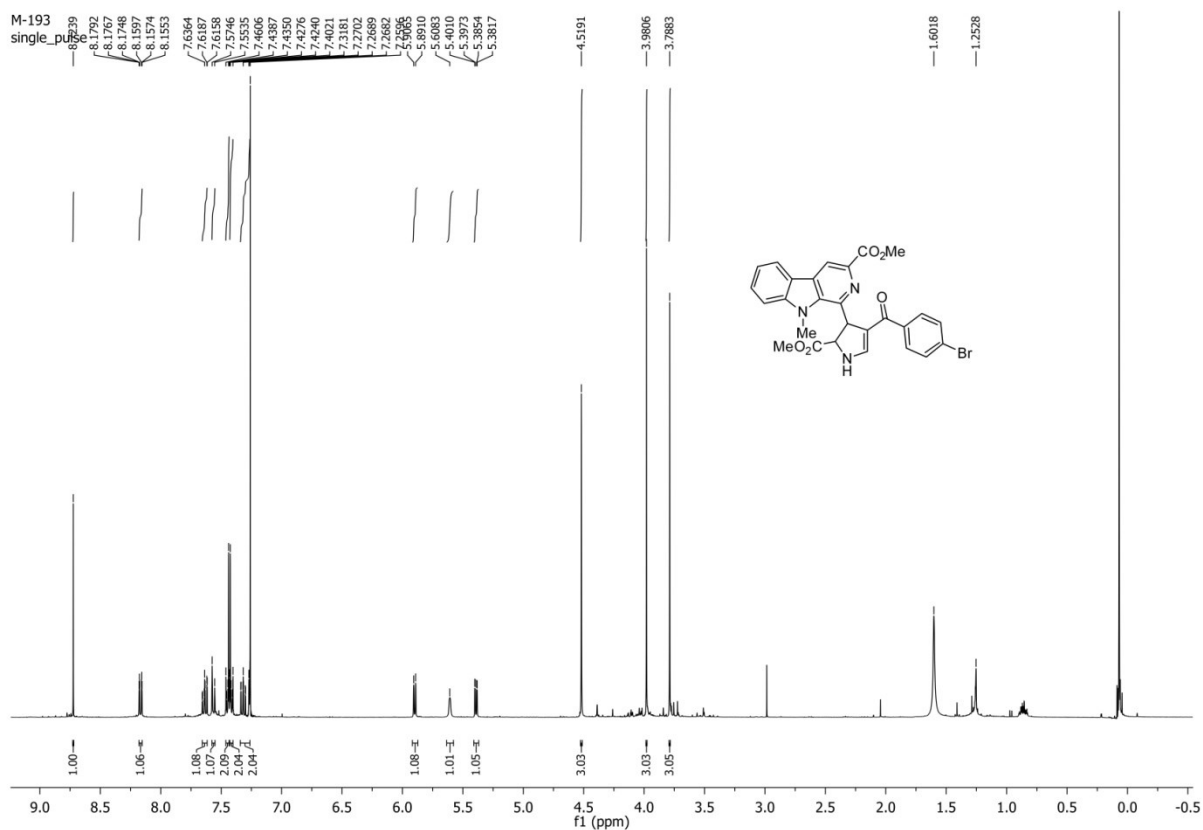

Figure S29. <sup>1</sup>H-NMR spectrum of **1bC** in CDCl<sub>3</sub>.

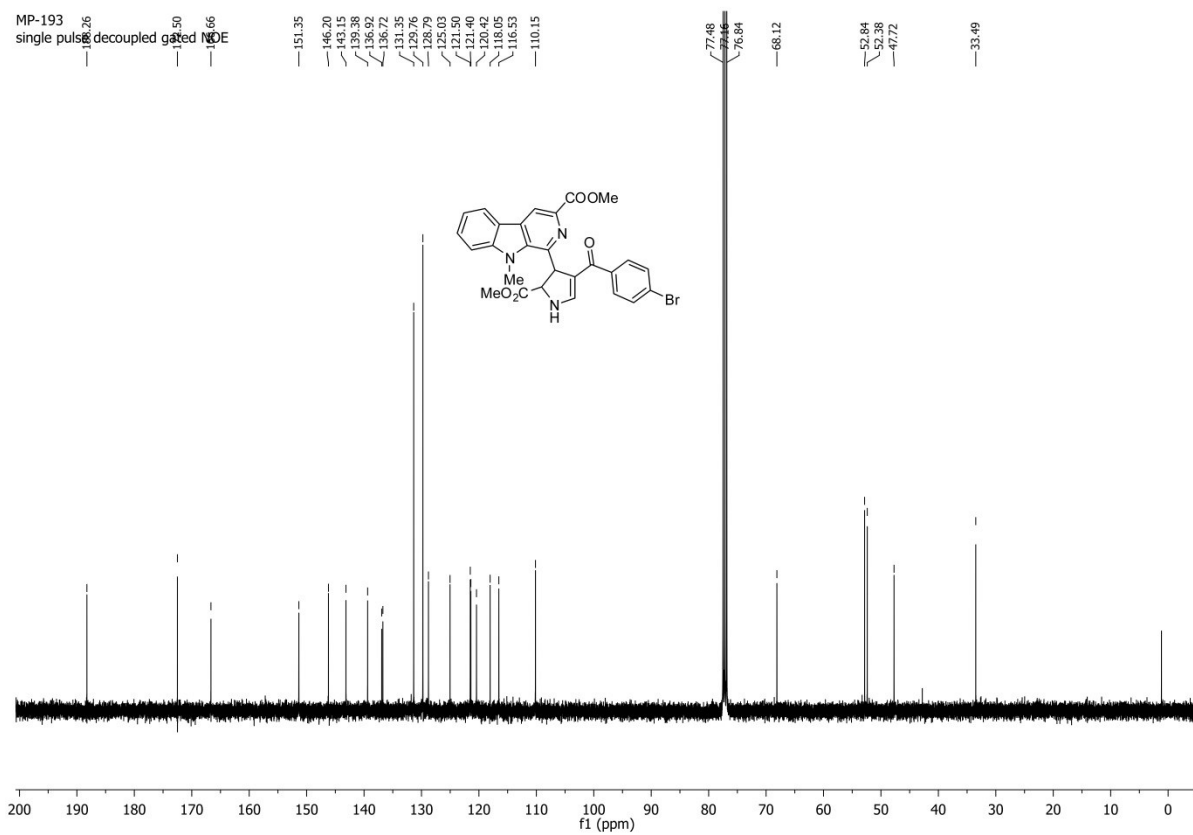

Figure S30. <sup>13</sup>C-NMR spectrum of **1bC** in CDCl<sub>3</sub>.

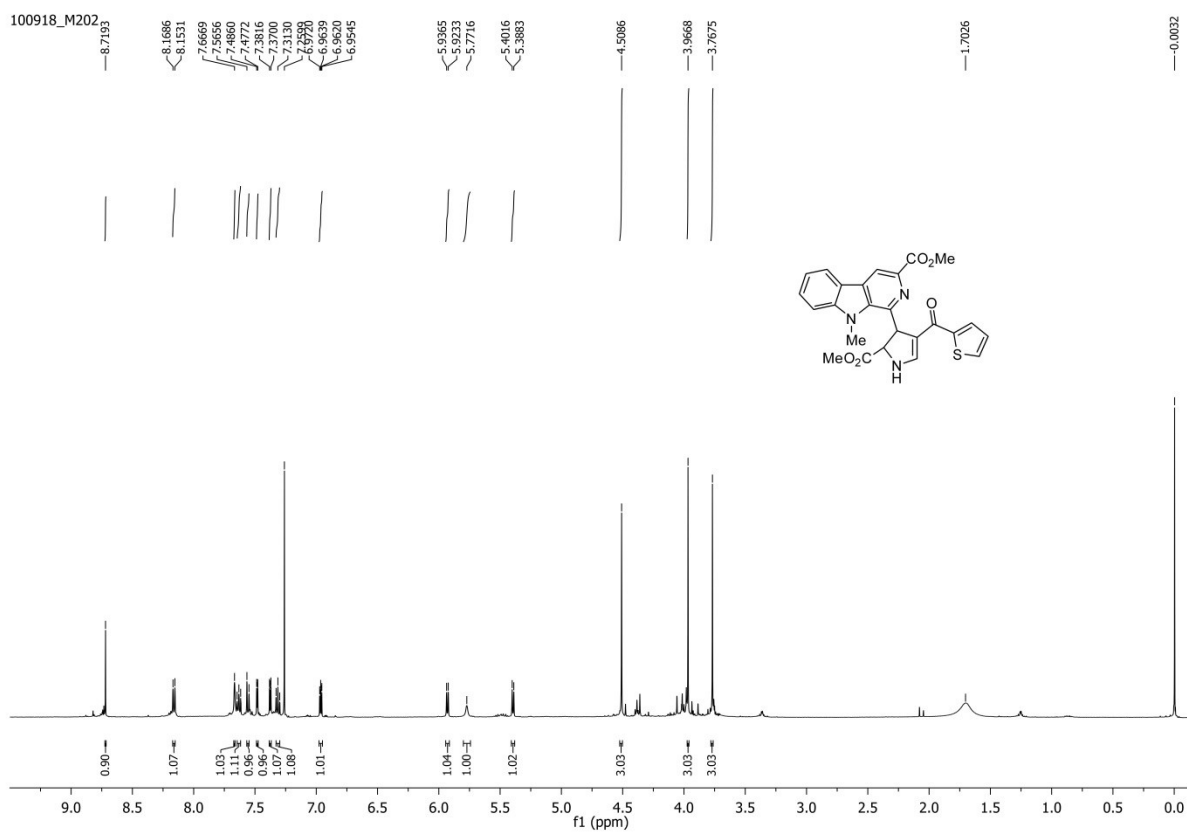

Figure S31.  $^1\text{H-NMR}$  spectrum of **1bI** in  $\text{CDCl}_3$ .

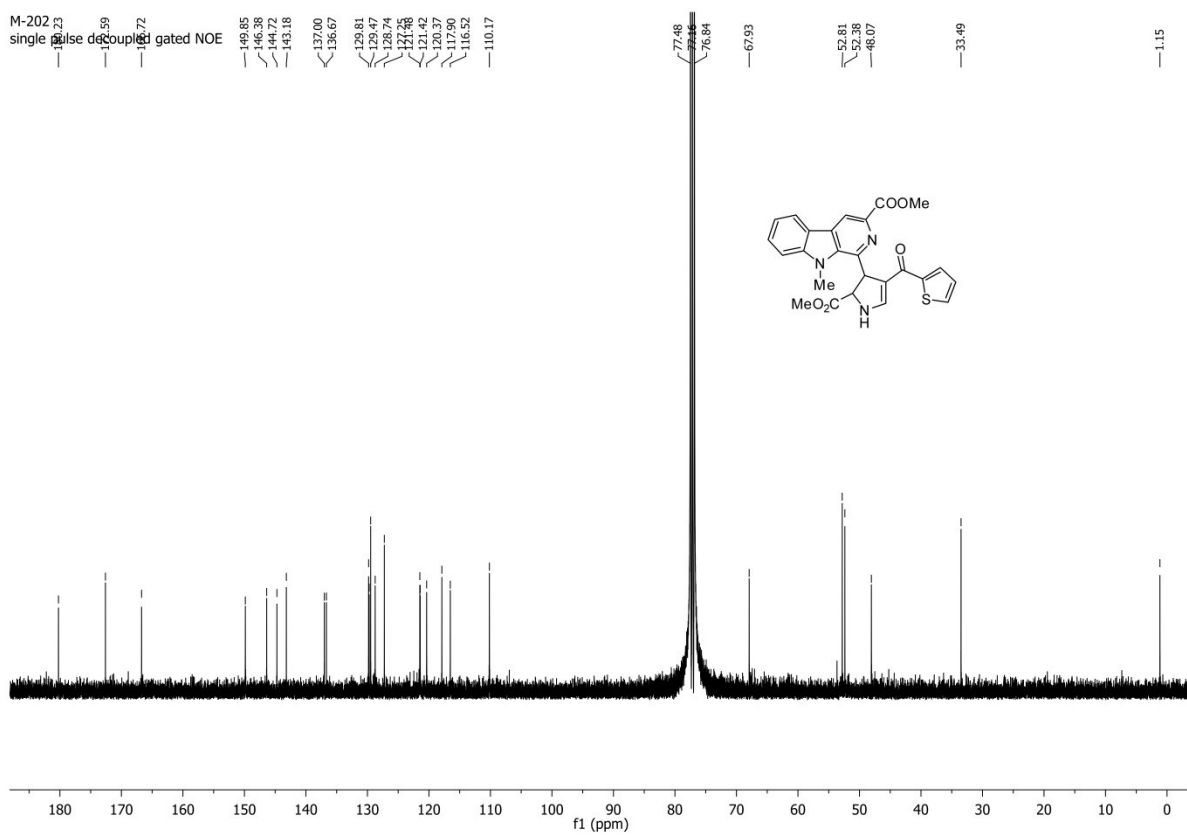

Figure S32.  $^{13}\text{C-NMR}$  spectrum of **1bI** in  $\text{CDCl}_3$ .

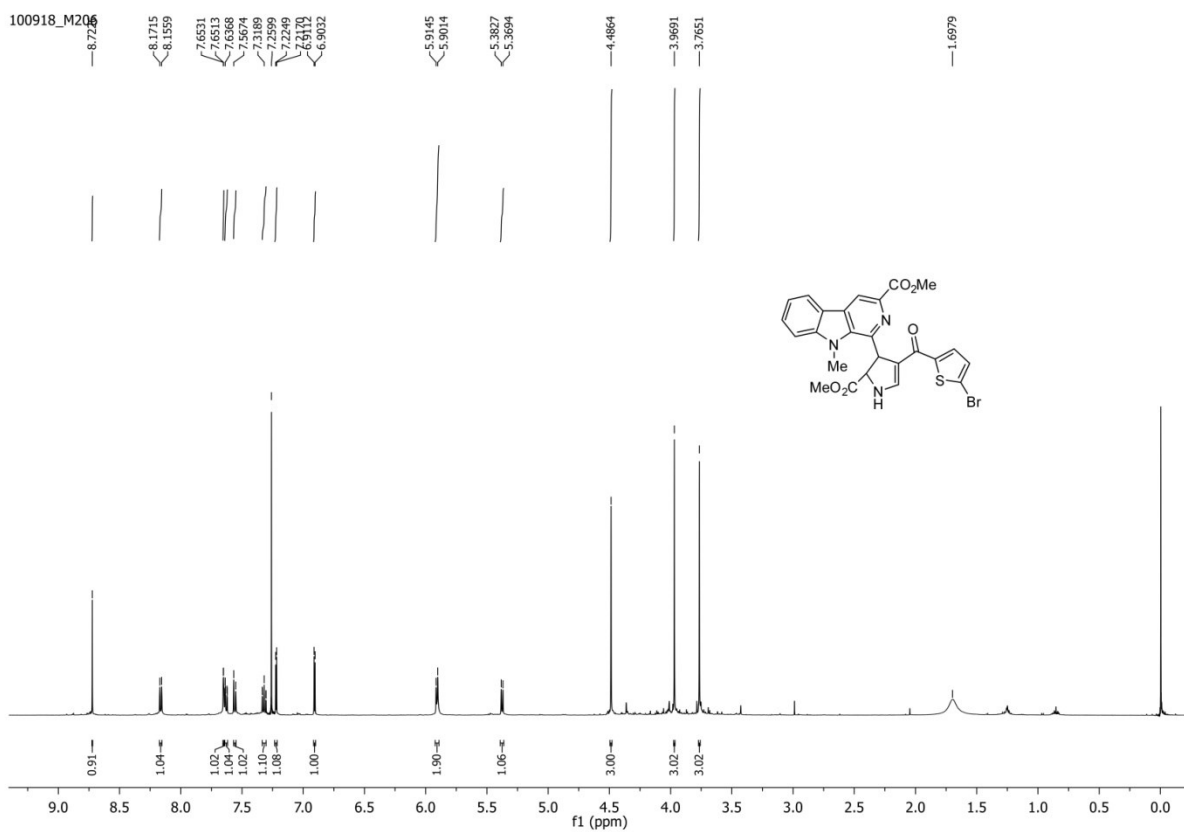

Figure S33.  $^1\text{H-NMR}$  spectrum of **1bJ** in  $\text{CDCl}_3$ .

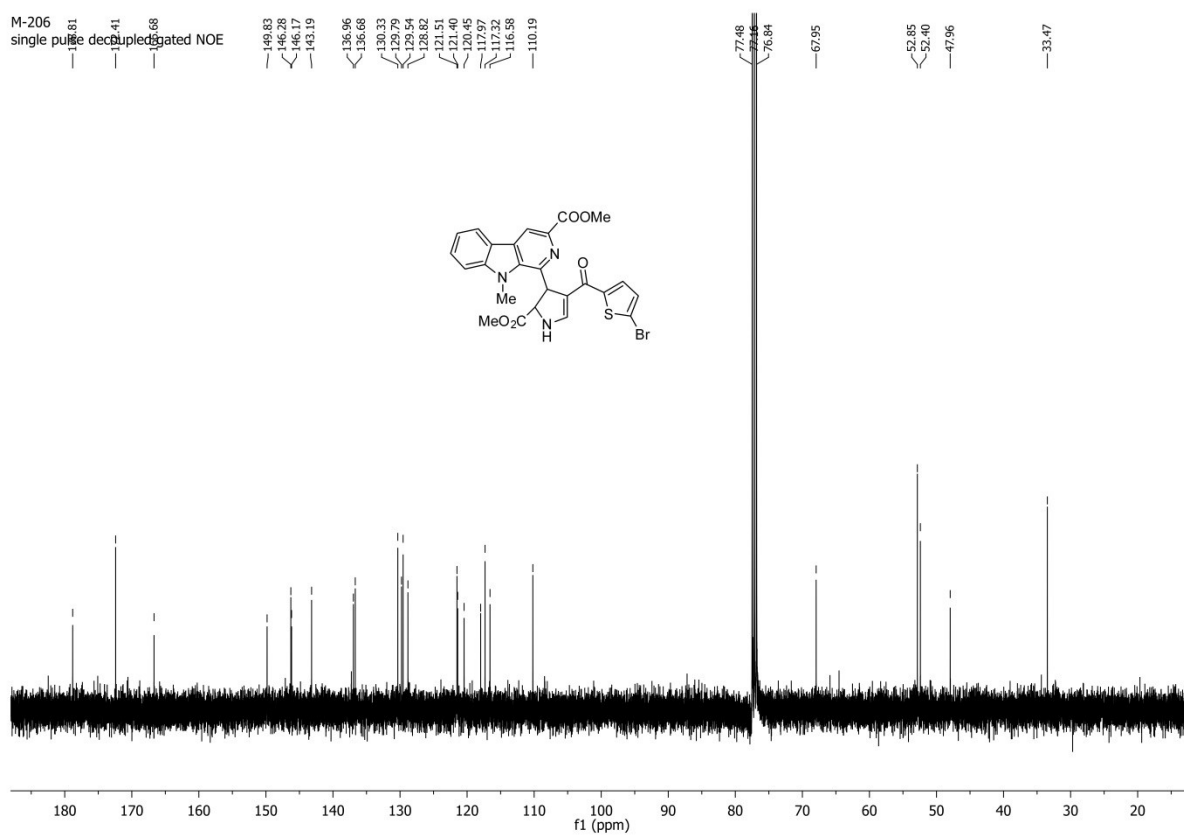

Figure S34.  $^{13}\text{C-NMR}$  spectrum of **1bJ** in  $\text{CDCl}_3$ .

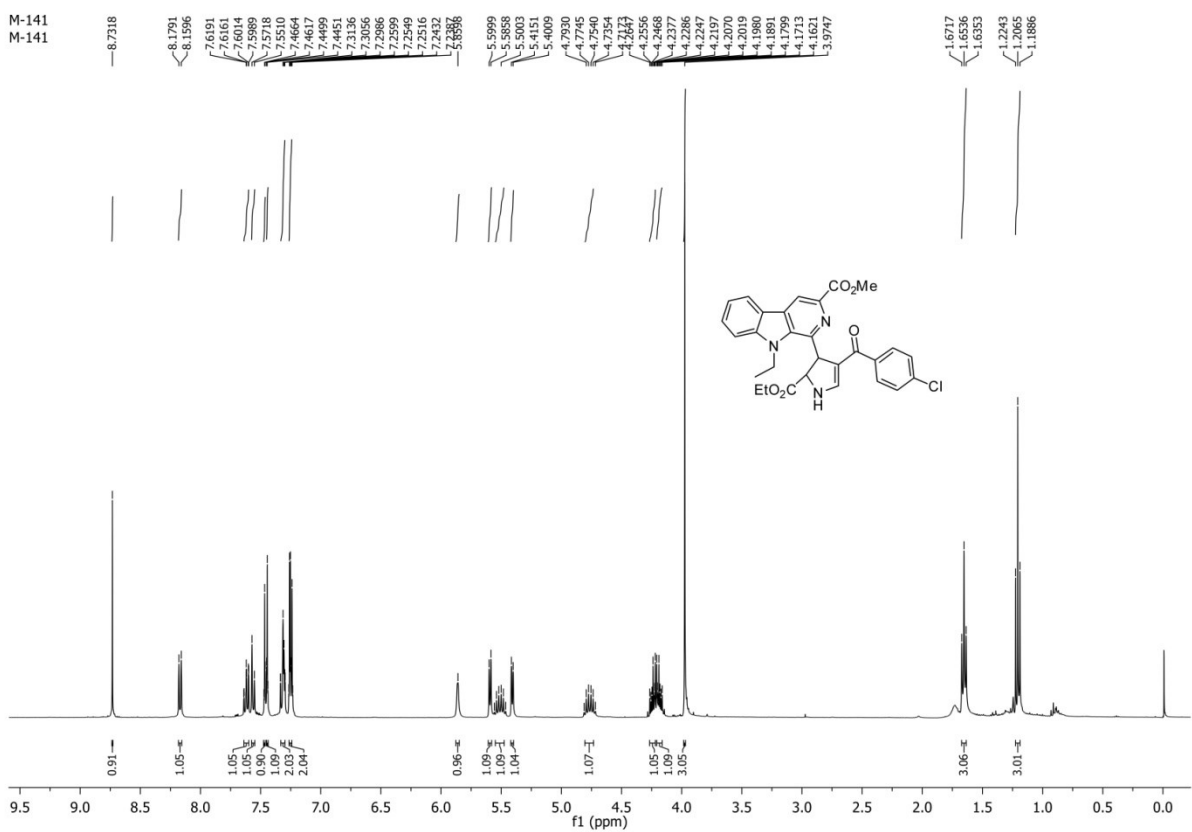

Figure S35.  $^1\text{H-NMR}$  spectrum of **2aD** in  $\text{CDCl}_3$ .

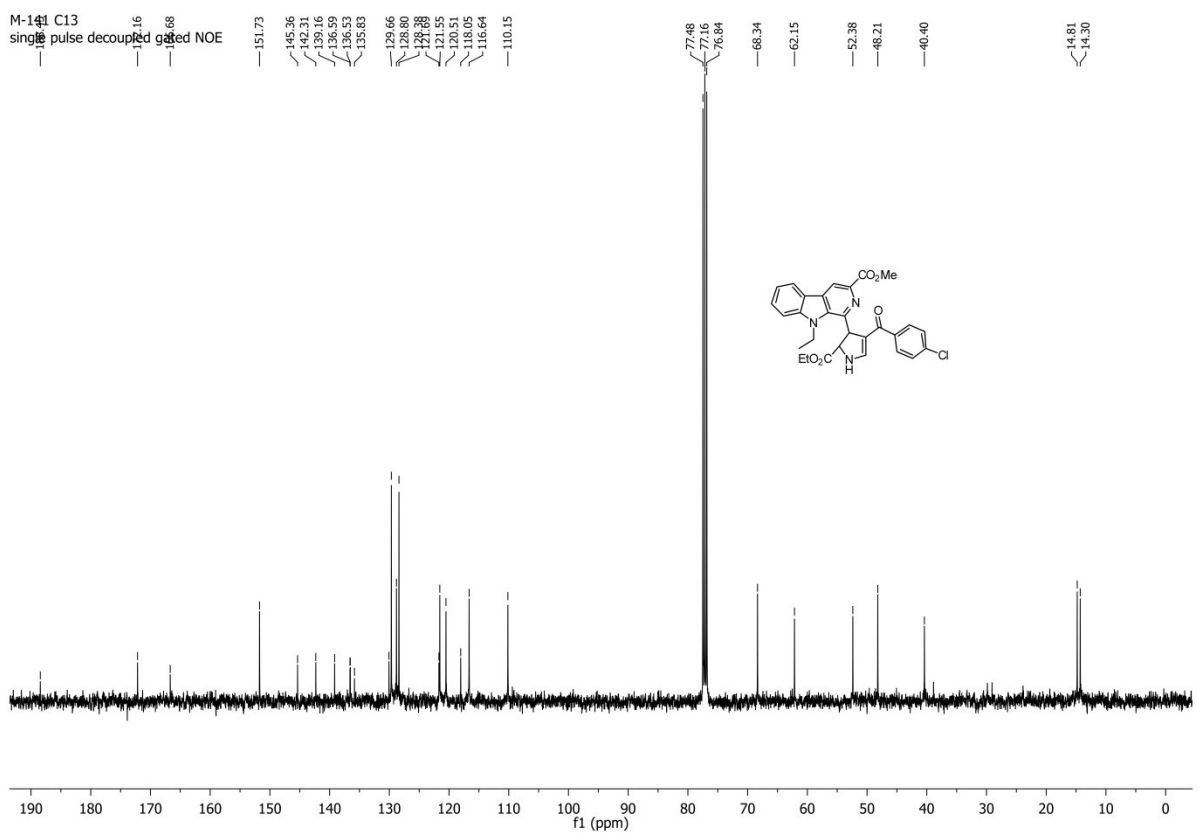

Figure S36.  $^{13}\text{C-NMR}$  spectrum of **2aD** in  $\text{CDCl}_3$ .

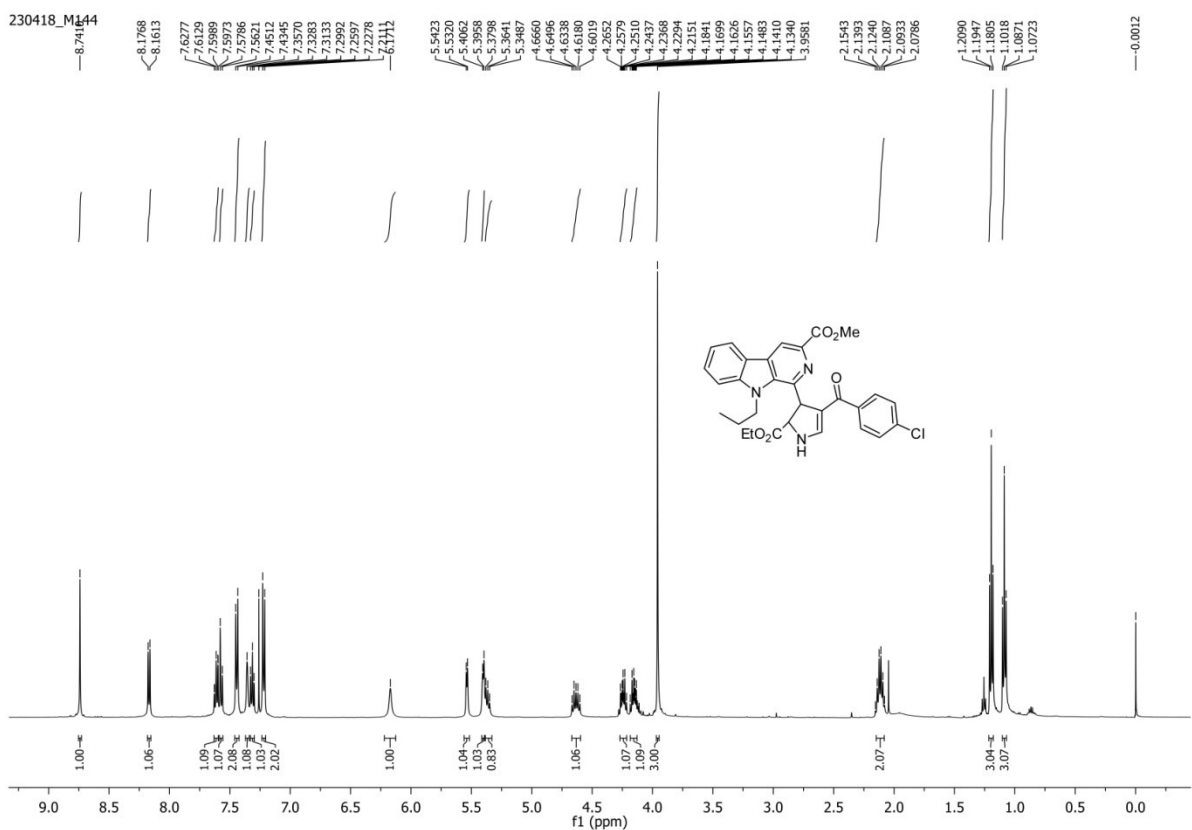

Figure S37.  $^1\text{H-NMR}$  spectrum of **3aD** in  $\text{CDCl}_3$ .

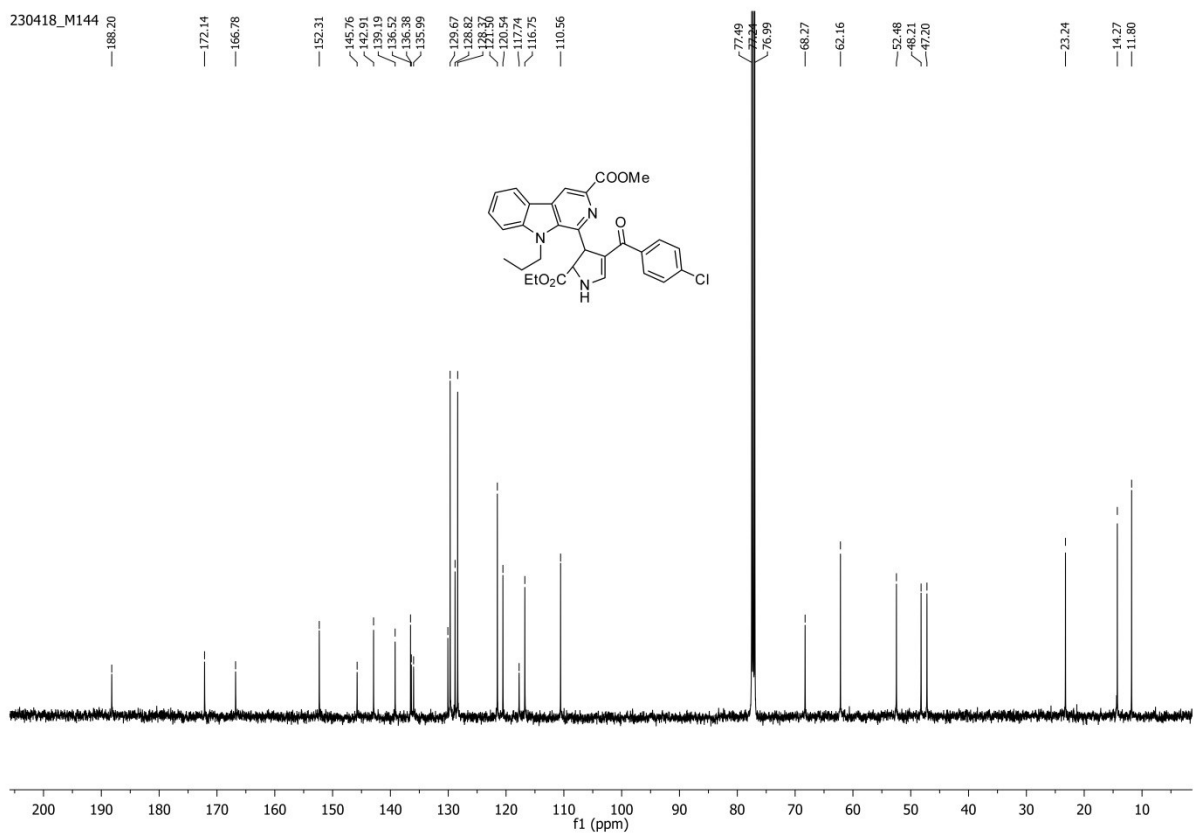

Figure S38.  $^{13}\text{C-NMR}$  spectrum of **3aD** in  $\text{CDCl}_3$ .

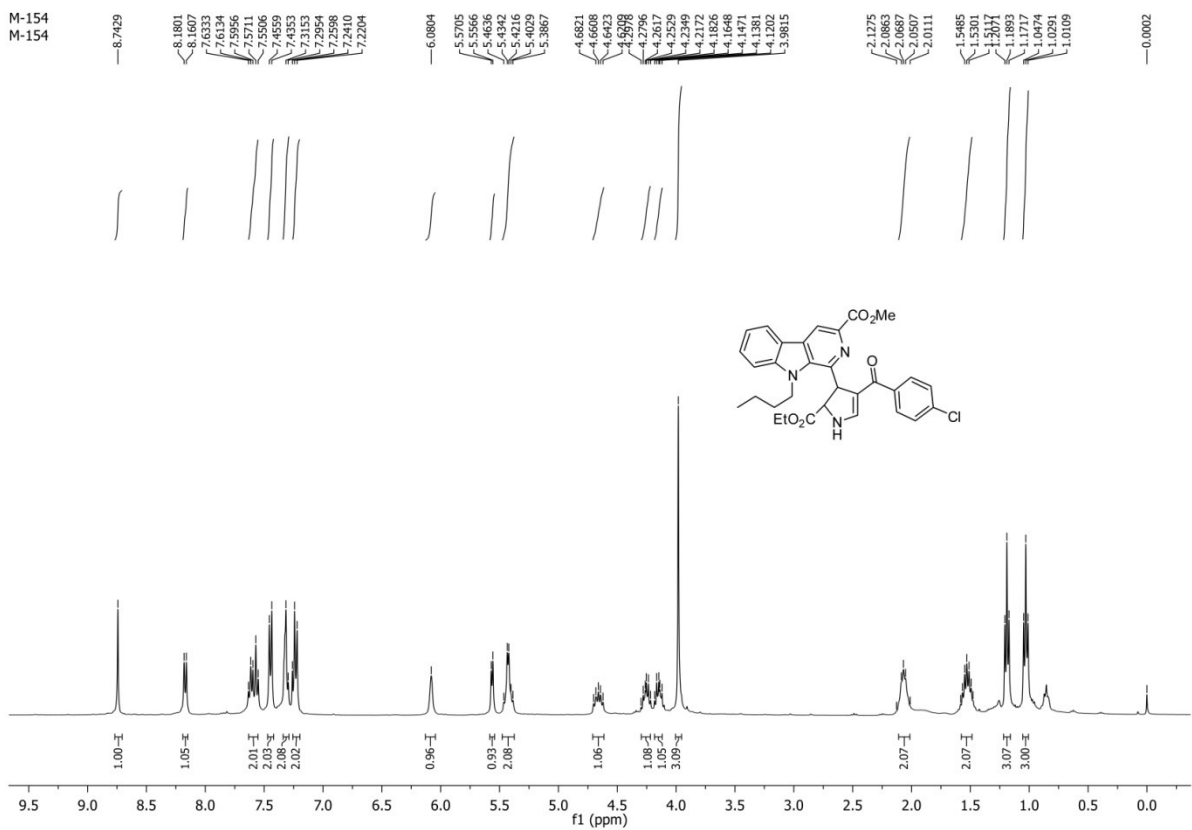

Figure S39.  $^1\text{H-NMR}$  spectrum of **4aD** in  $\text{CDCl}_3$ .

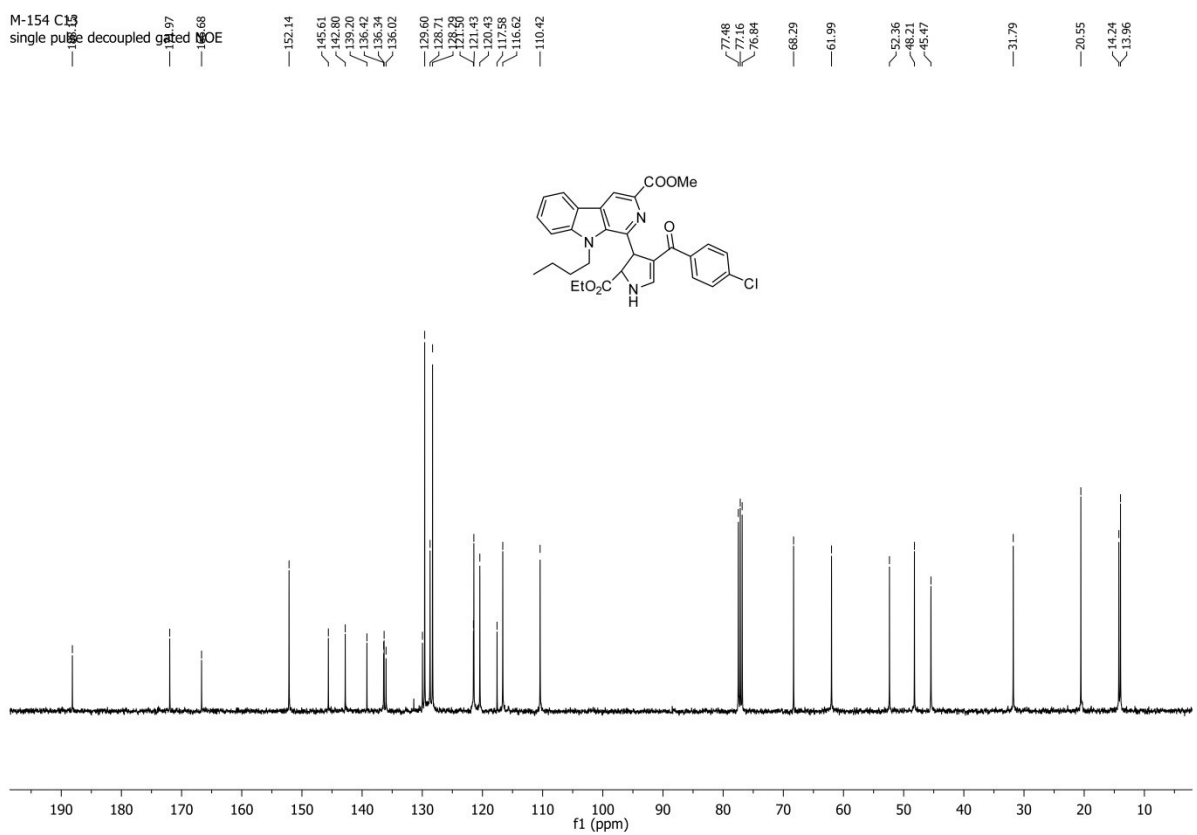

Figure S40.  $^{13}\text{C-NMR}$  spectrum of **4aD** in  $\text{CDCl}_3$ .

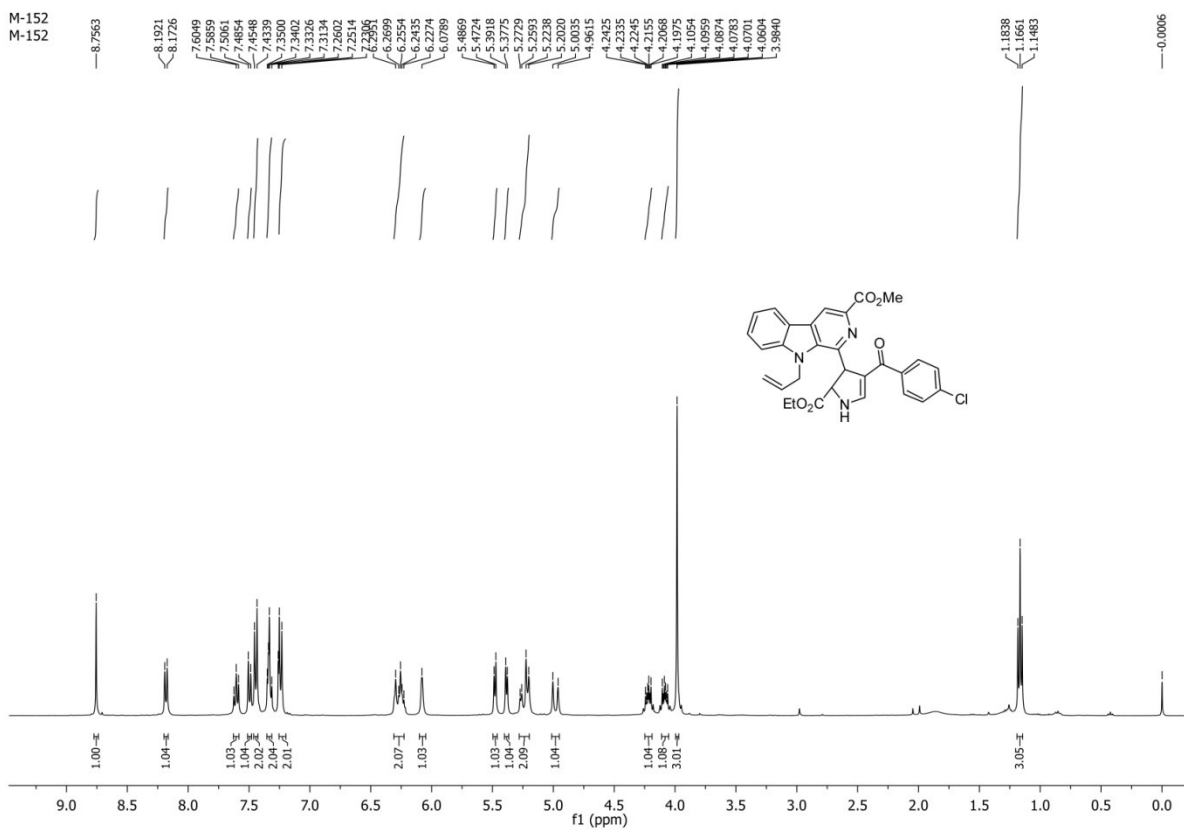

Figure S41.  $^1\text{H-NMR}$  spectrum of **5aD** in  $\text{CDCl}_3$ .

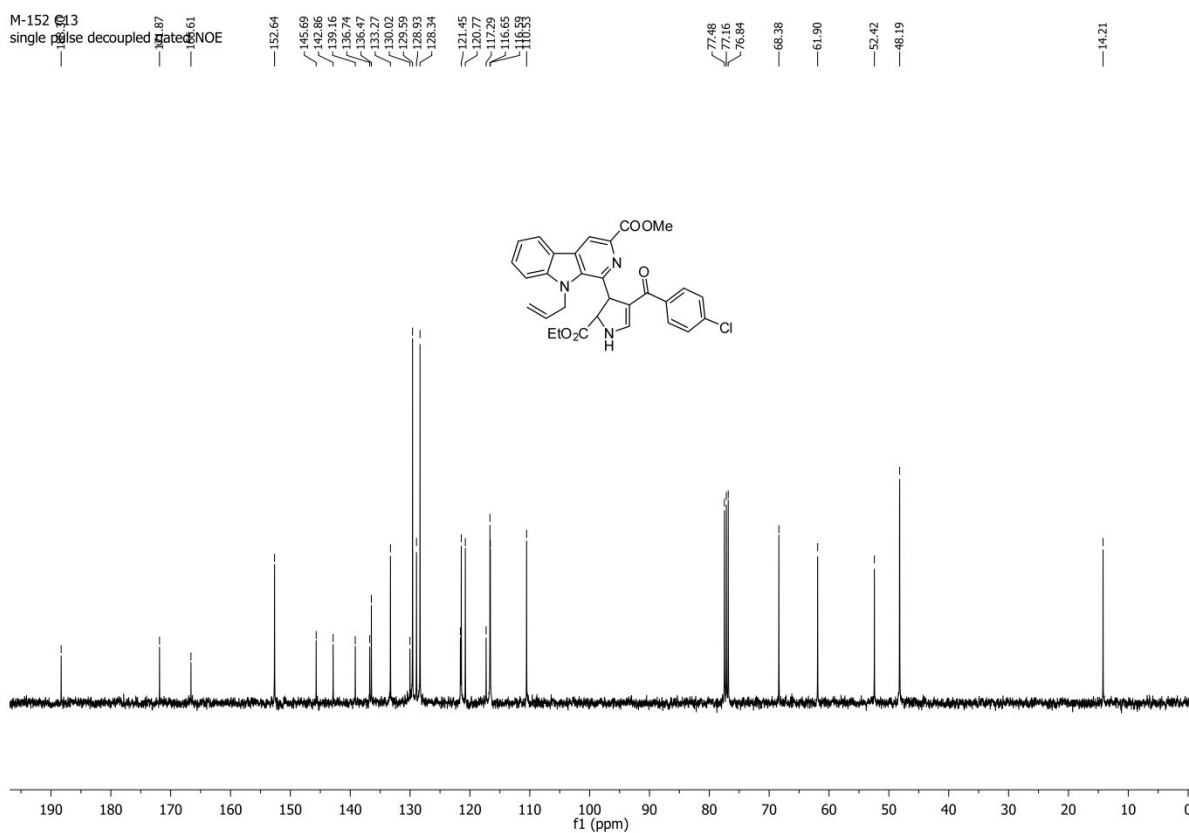

Figure S42.  $^{13}\text{C-NMR}$  spectrum of **5aD** in  $\text{CDCl}_3$ .



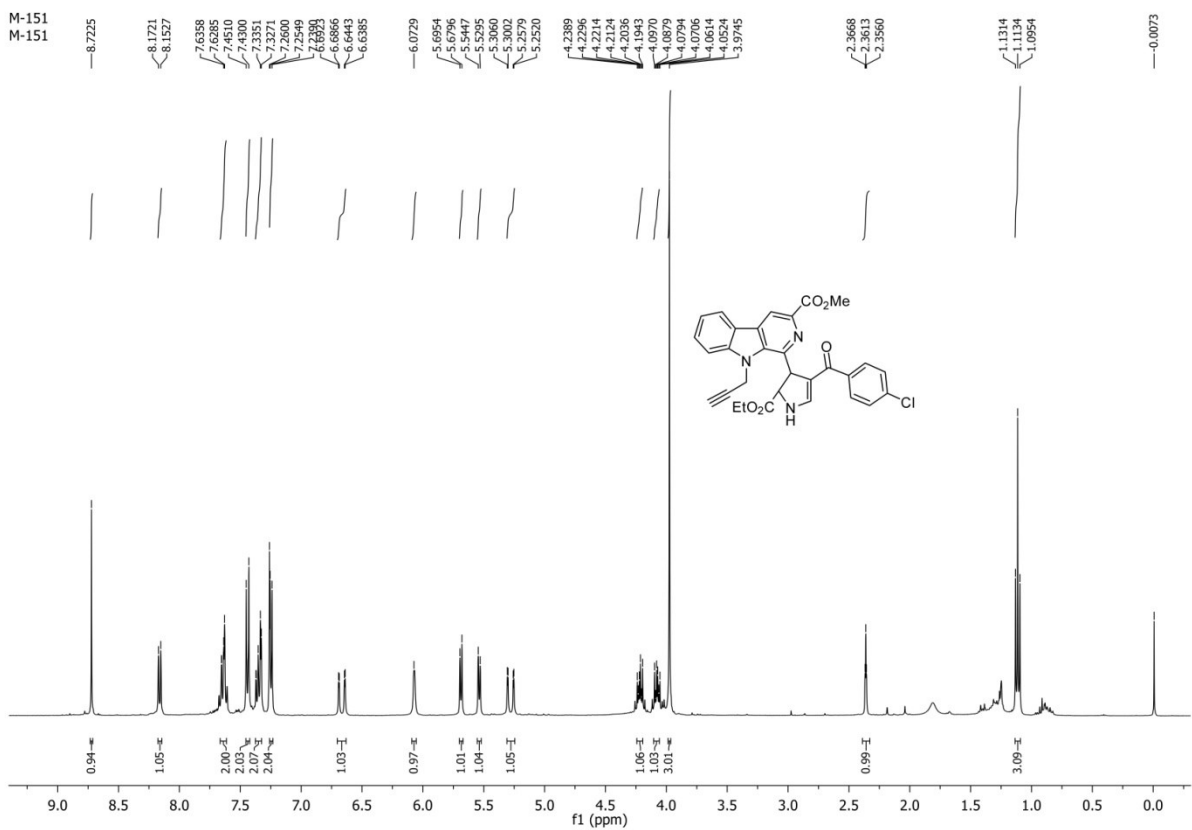

Figure S43.  $^1\text{H-NMR}$  spectrum of **6aD** in  $\text{CDCl}_3$ .

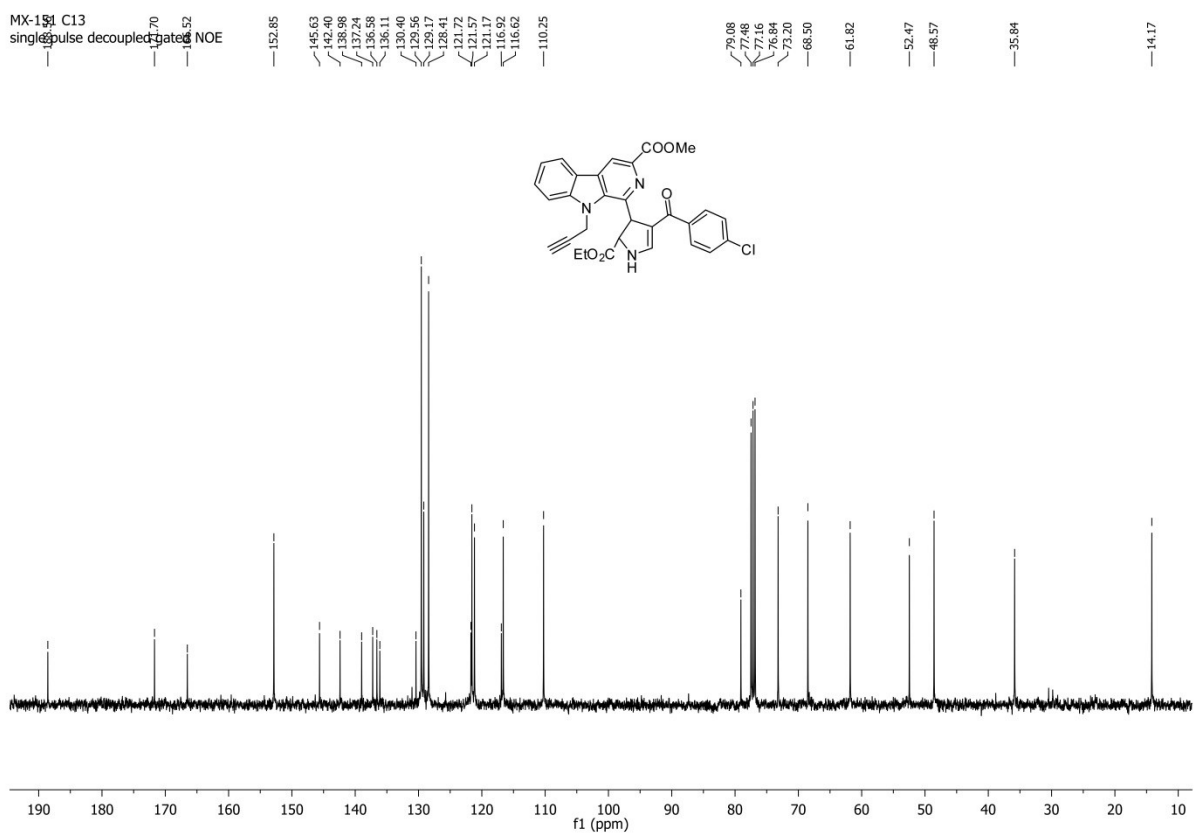

Figure S44.  $^{13}\text{C-NMR}$  spectrum of **6aD** in  $\text{CDCl}_3$ .

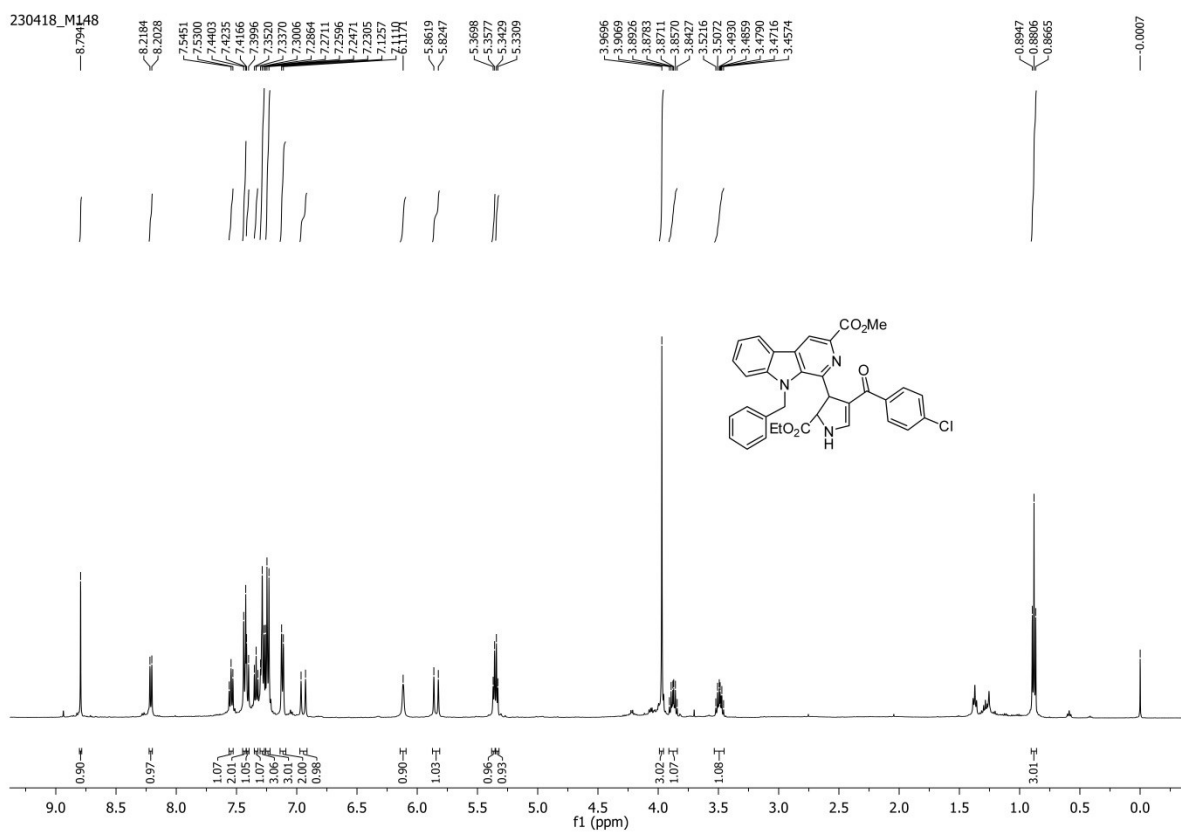

Figure S45. <sup>1</sup>H-NMR spectrum of **7aD** in CDCl<sub>3</sub>.

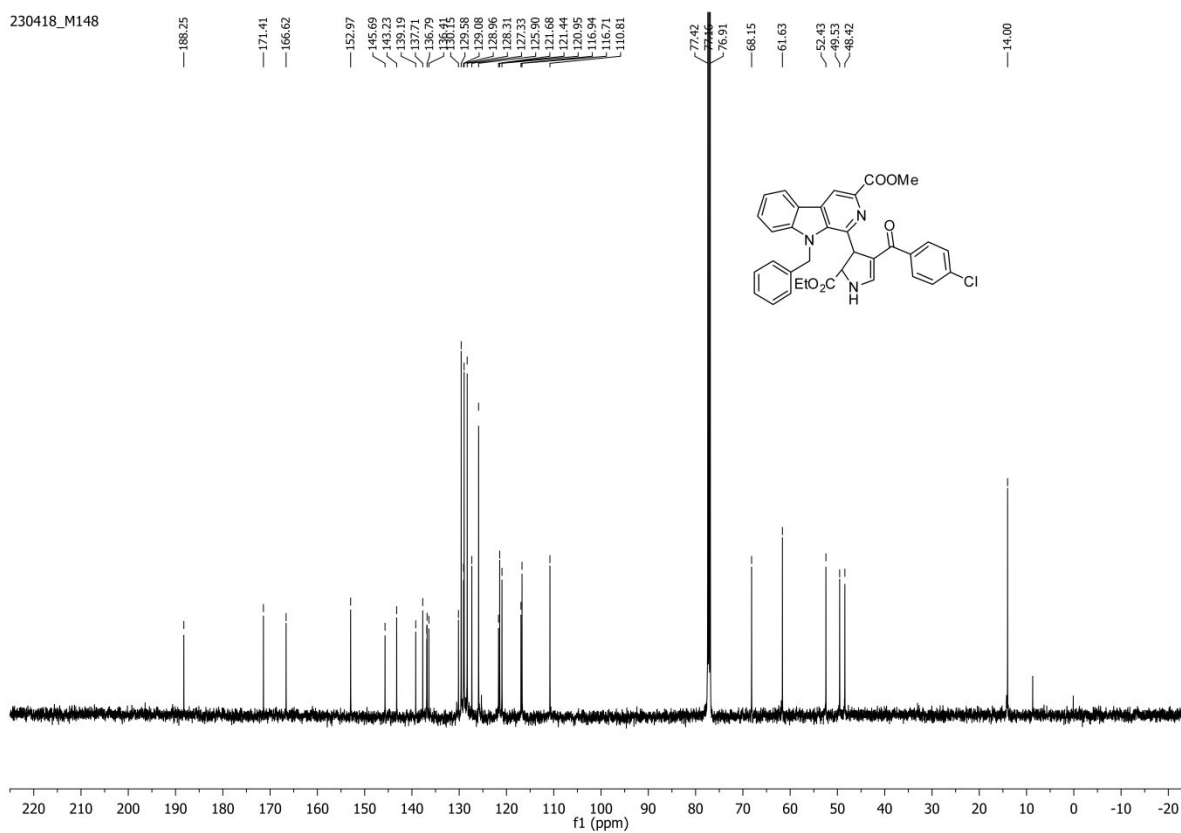

Figure S46. <sup>13</sup>C-NMR spectrum of **7aD** in CDCl<sub>3</sub>.

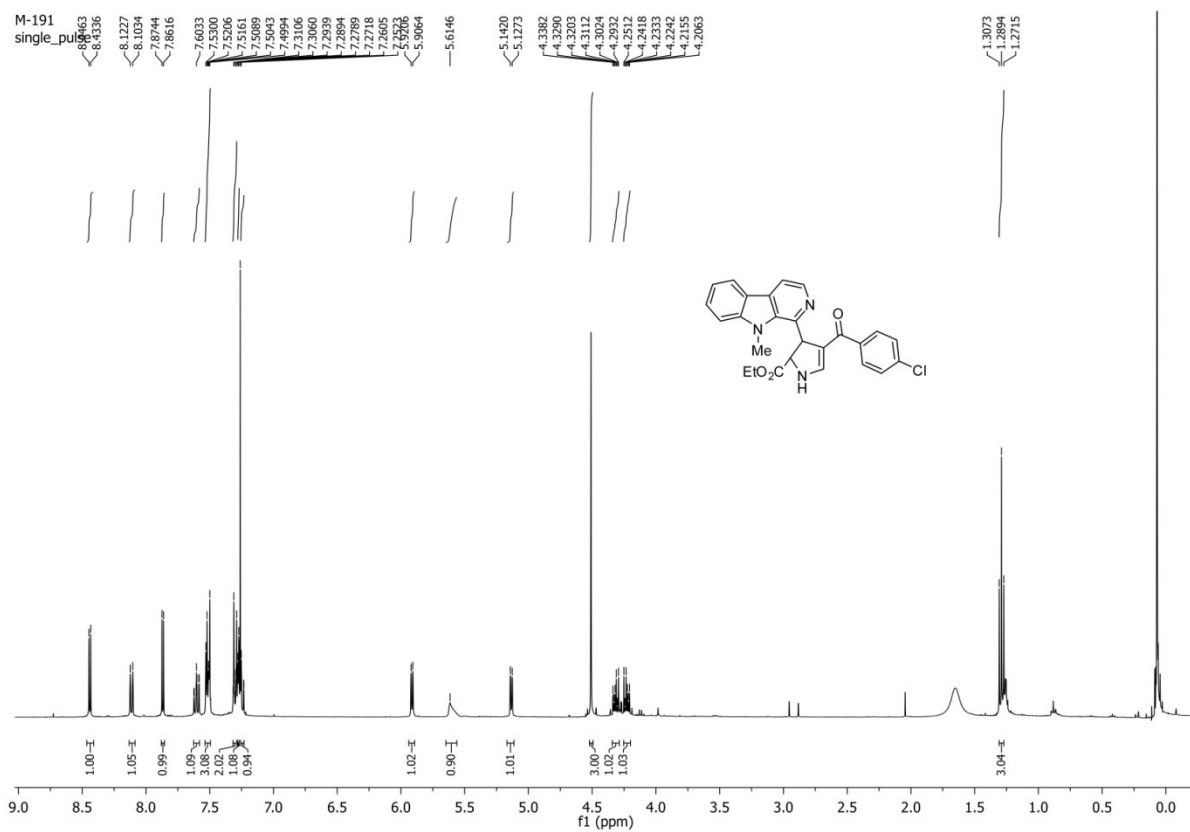

Figure S47.  $^1\text{H-NMR}$  spectrum of **9aD** in  $\text{CDCl}_3$ .

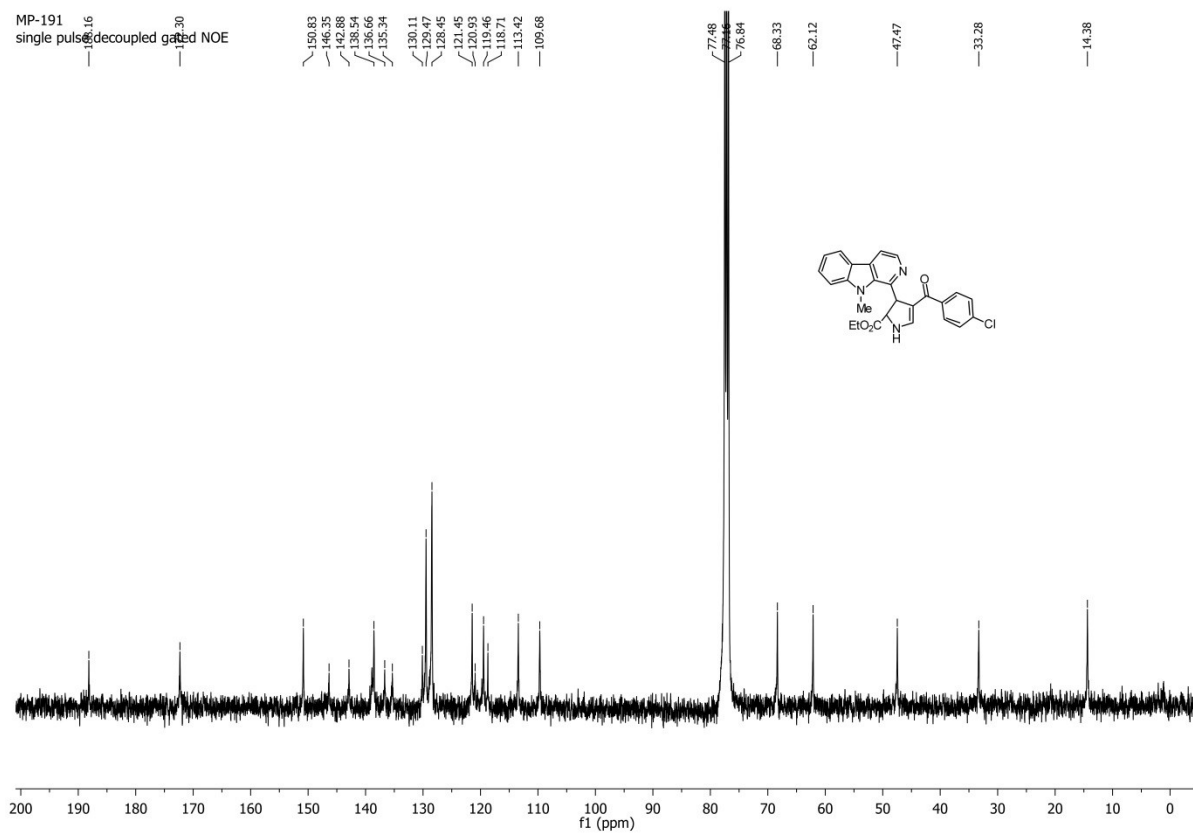

Figure S48.  $^{13}\text{C-NMR}$  spectrum of **9aD** in  $\text{CDCl}_3$ .

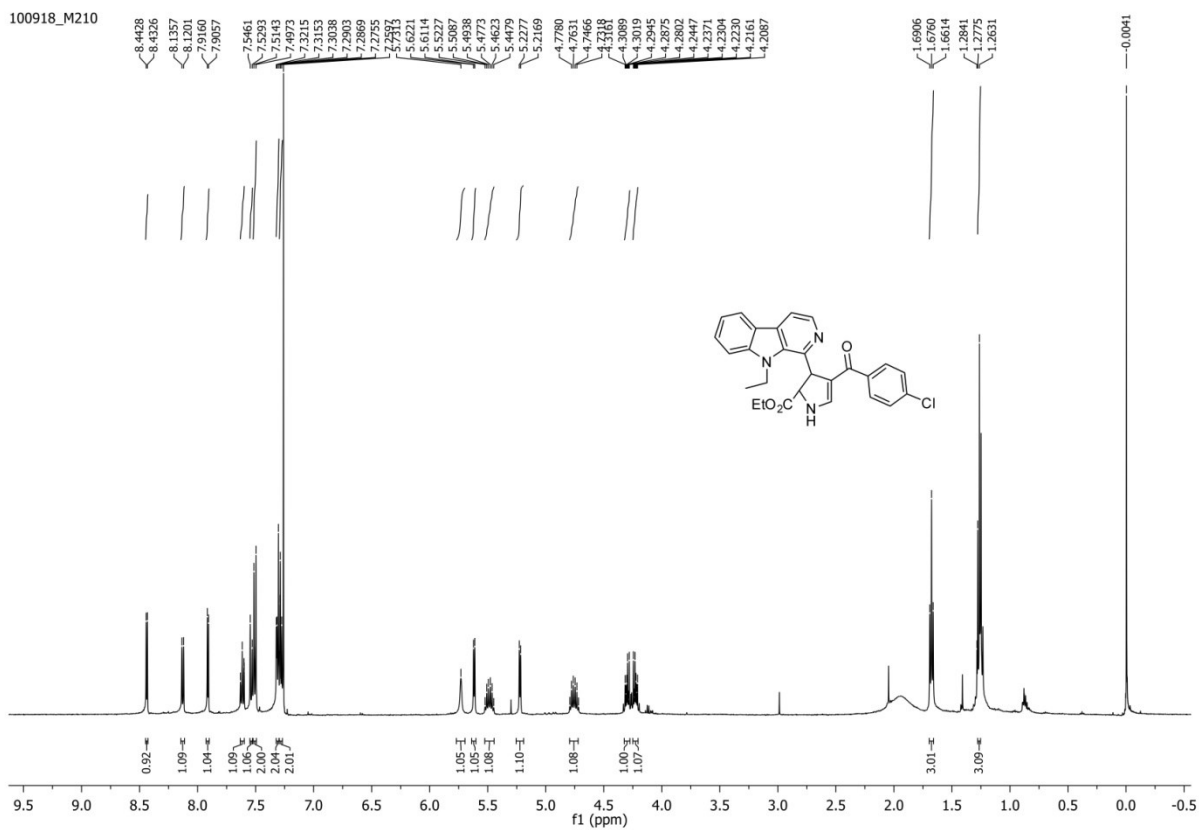

Figure S49.  $^1\text{H-NMR}$  spectrum of **10aD** in  $\text{CDCl}_3$ .

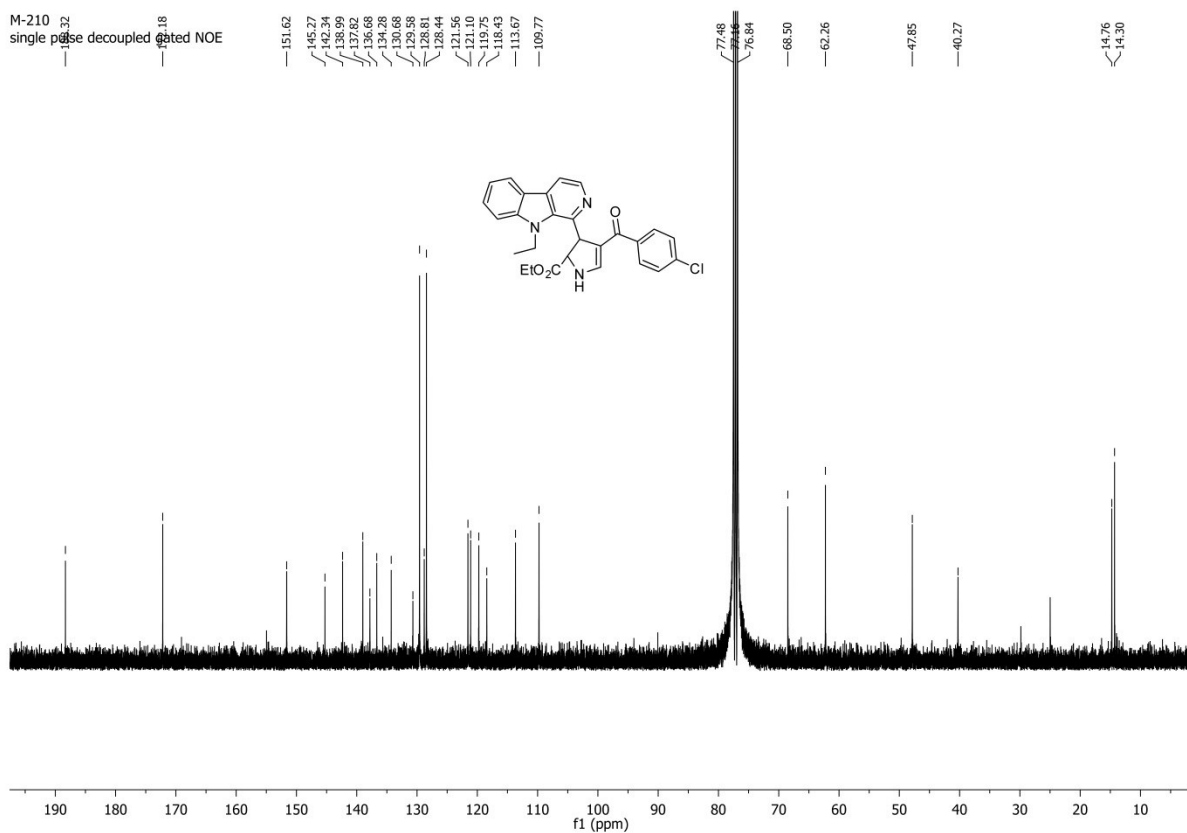

Figure S50.  $^{13}\text{C-NMR}$  spectrum of **10aD** in  $\text{CDCl}_3$ .

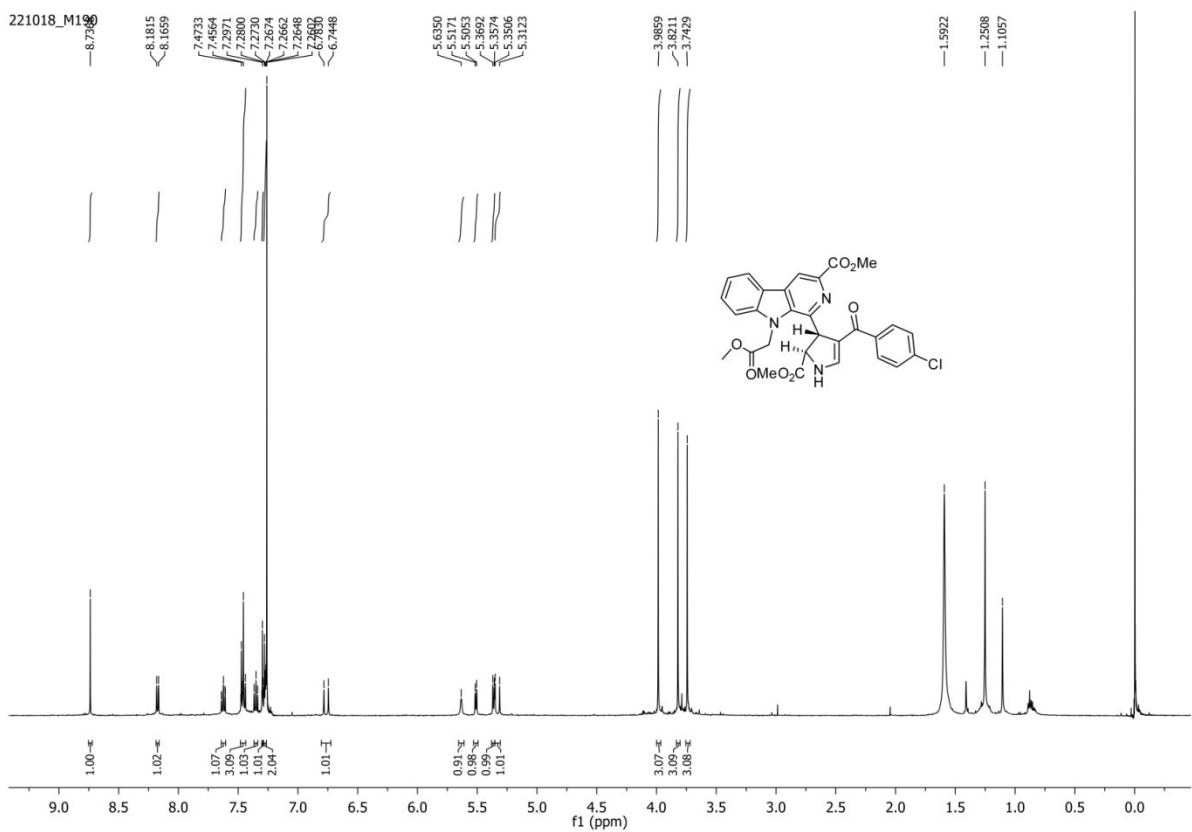

Figure S51.  $^1\text{H-NMR}$  spectrum of **8bD** in  $\text{CDCl}_3$ .

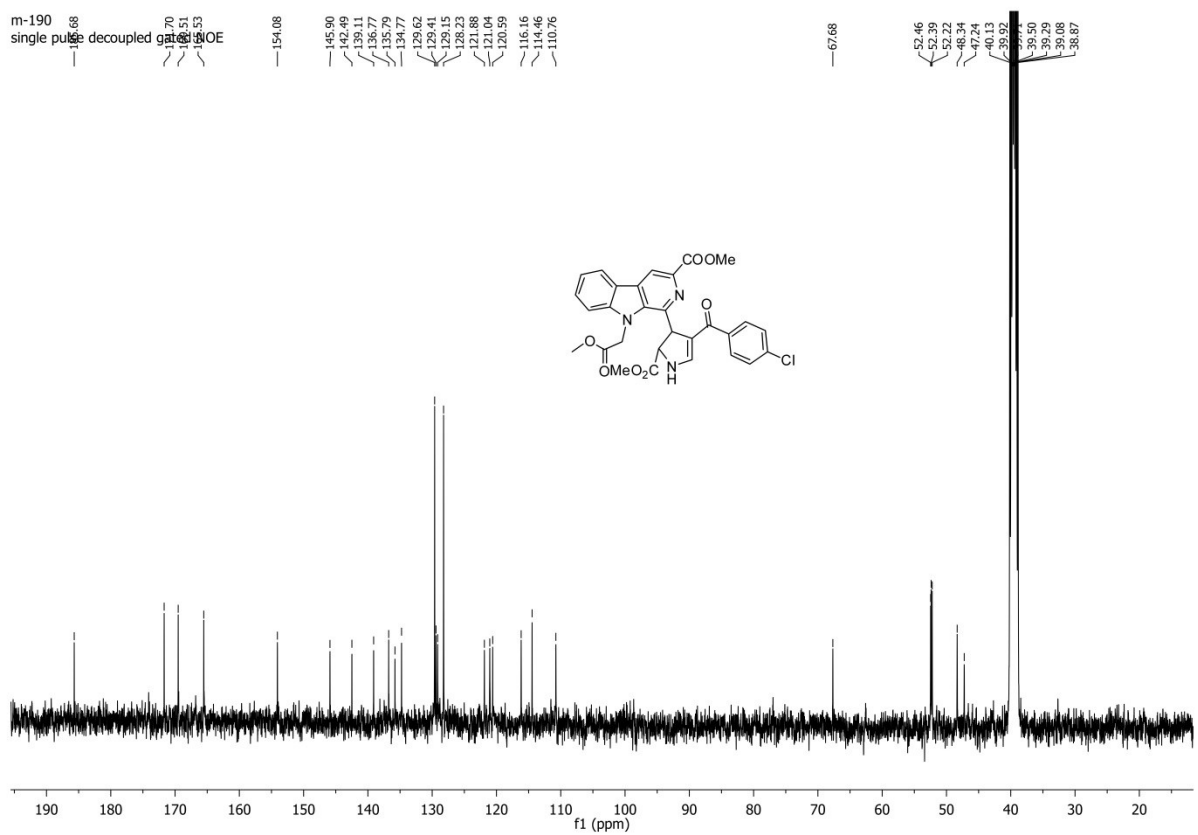

Figure S52.  $^{13}\text{C-NMR}$  spectrum of **8bD** in  $\text{DMSO-d}_6$ .

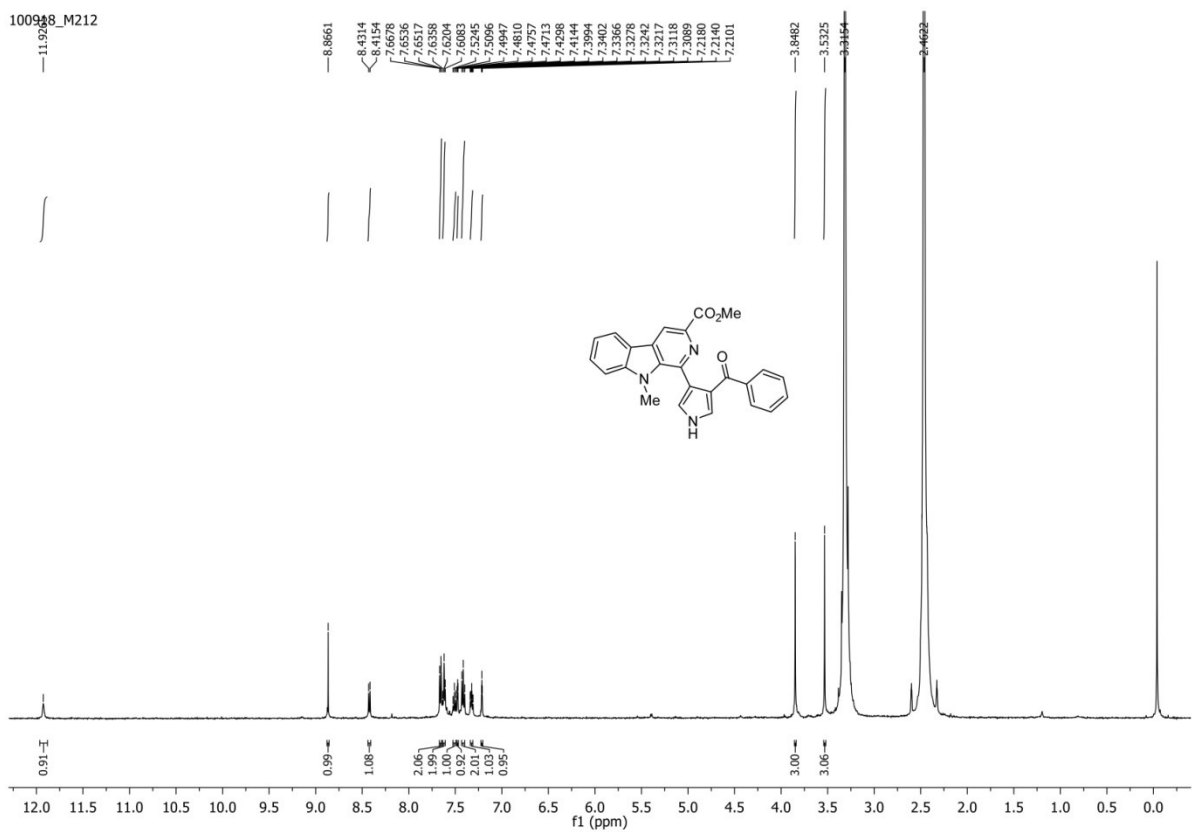

**Figure S53.** <sup>1</sup>H-NMR spectrum of **1cA** in DMSO-*d*<sub>6</sub>.

It is mentioned that the <sup>13</sup>C-NMR spectrum of **1cA** could not be recorded due to solubility problem in CDCl<sub>3</sub> as well as DMSO-*d*<sub>6</sub>.

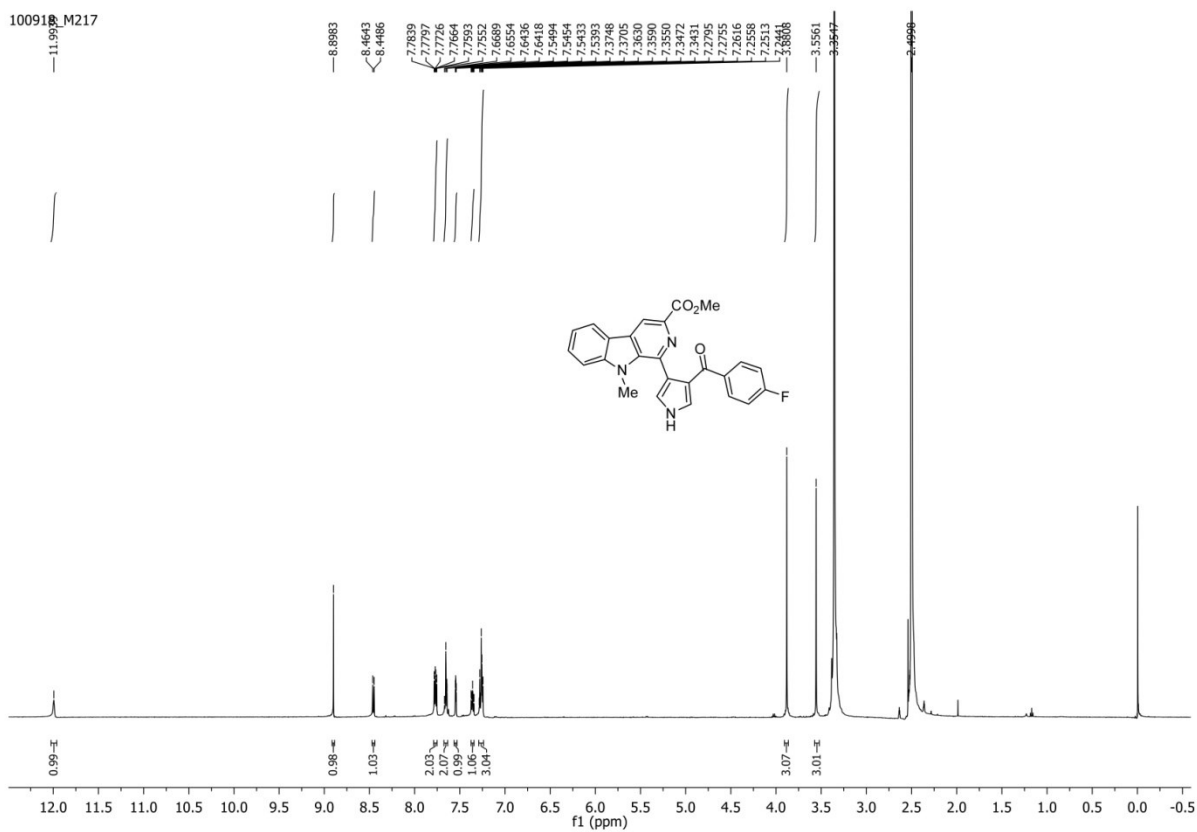

**Figure S54.** <sup>1</sup>H-NMR spectrum of **1cF** in DMSO-*d*<sub>6</sub>.

It is mentioned that the <sup>13</sup>C-NMR spectrum of **1cF** could not be recorded due to solubility problem in CDCl<sub>3</sub> as well as DMSO-*d*<sub>6</sub>.

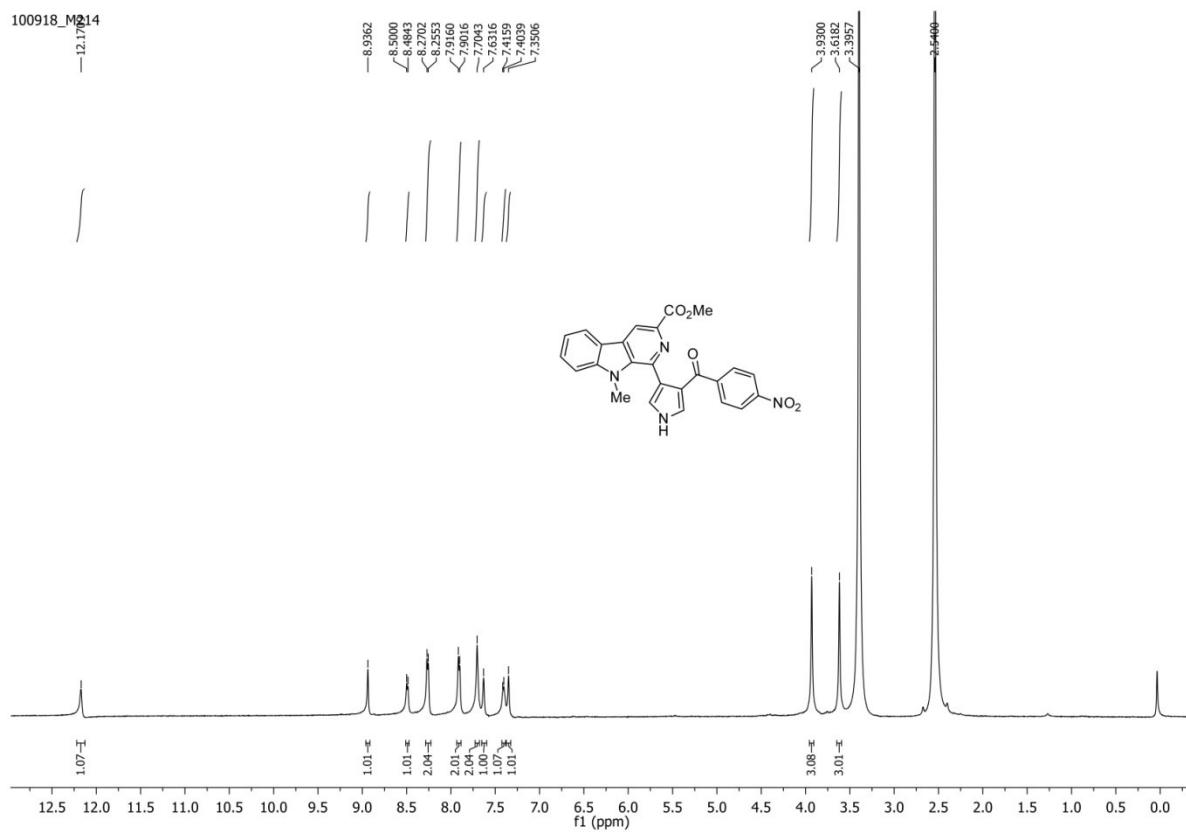

**Figure S55.** <sup>1</sup>H-NMR spectrum of **1cG** in DMSO-*d*<sub>6</sub>.

It is mentioned that the <sup>13</sup>C-NMR spectrum of **1cG** could not be recorded due to solubility problem in CDCl<sub>3</sub> as well as DMSO-*d*<sub>6</sub>.



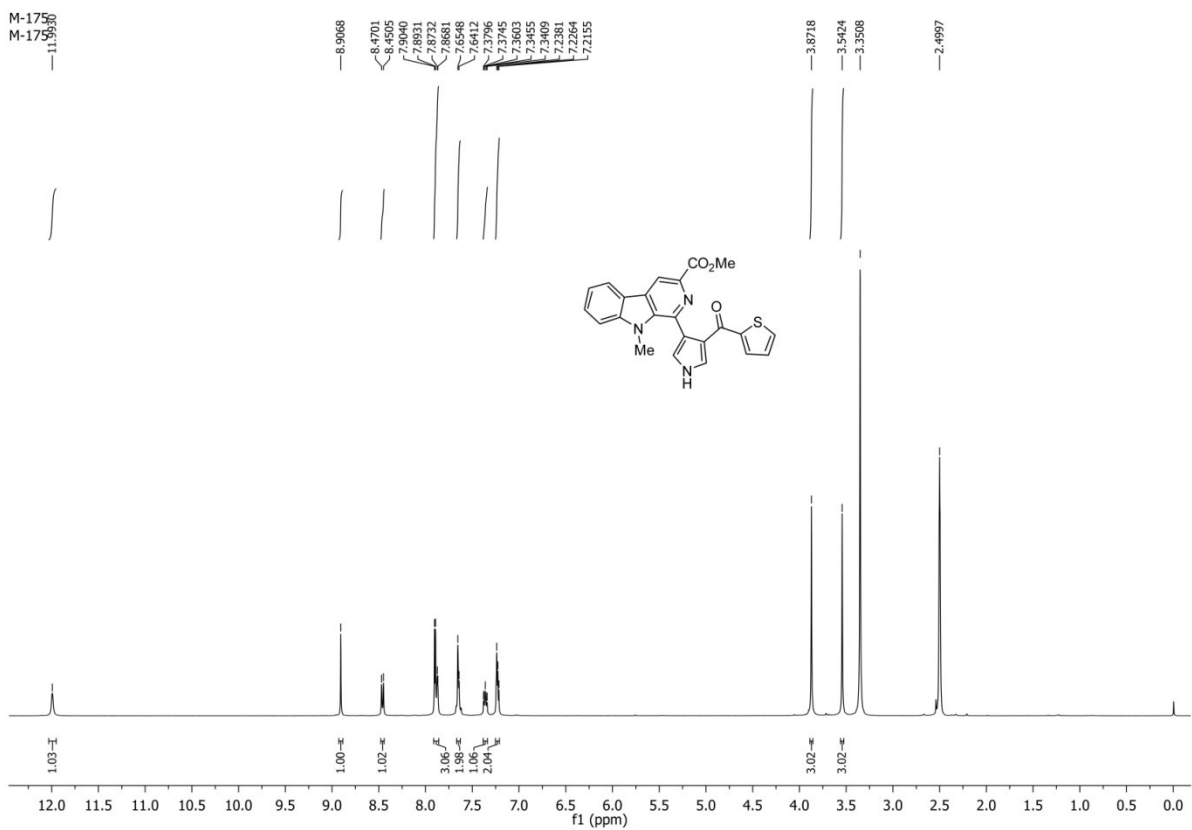

Figure S56.  $^1\text{H-NMR}$  spectrum of **1cI** in  $\text{DMSO-d}_6$ .

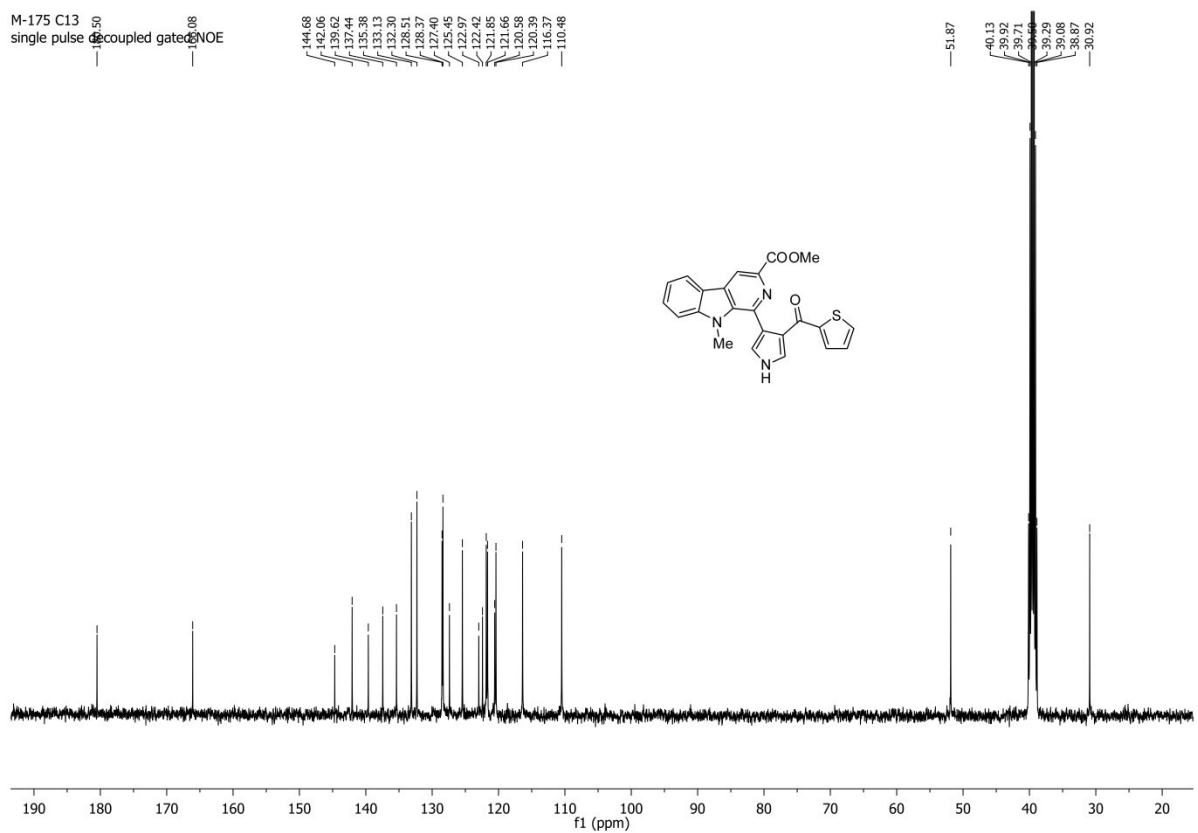

Figure S57.  $^{13}\text{C-NMR}$  spectrum of **1cI** in  $\text{DMSO-d}_6$ .

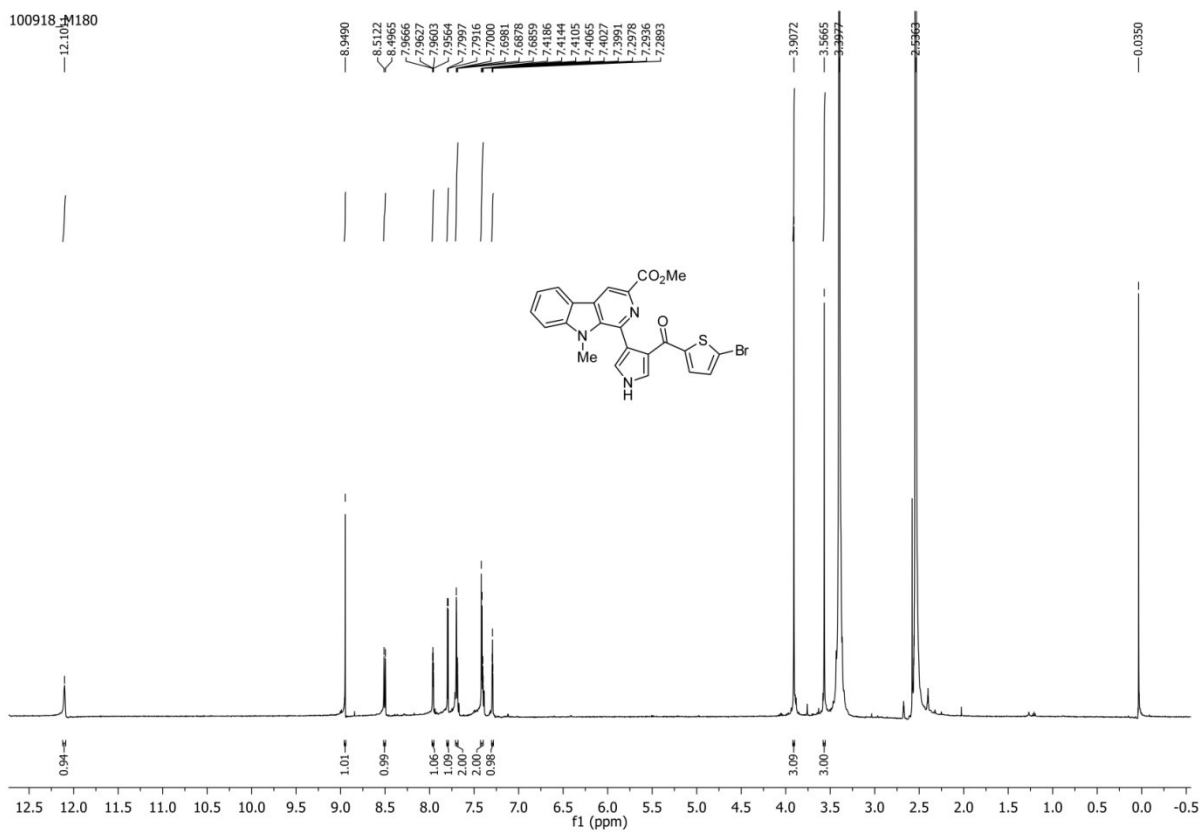

**Figure S58.**  $^1\text{H}$ -NMR spectrum of **1cJ** in  $\text{DMSO-}d_6$ .

It is mentioned that the  $^{13}\text{C}$ -NMR spectrum of **1cJ** could not be recorded due to solubility problem in  $\text{CDCl}_3$  as well as  $\text{DMSO-}d_6$ .

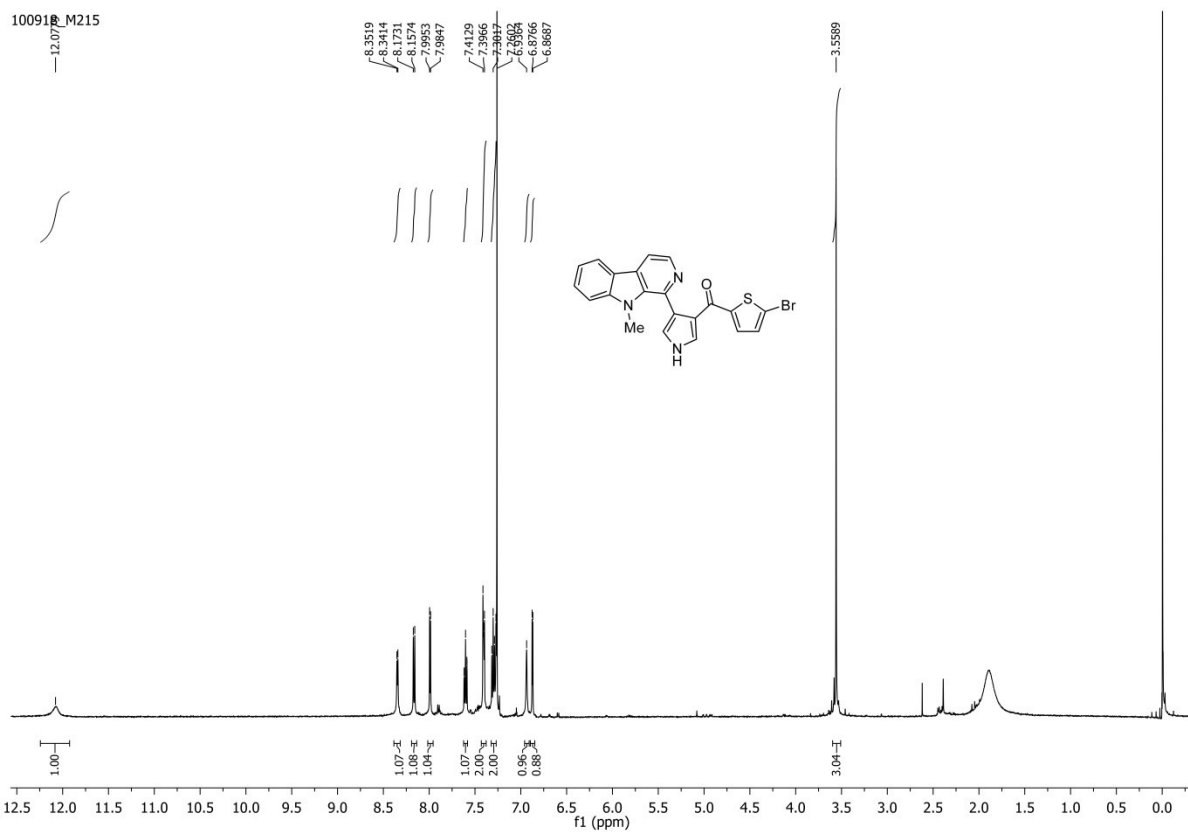

Figure S59.  $^1\text{H-NMR}$  spectrum of **9cJ** in  $\text{CDCl}_3$ .

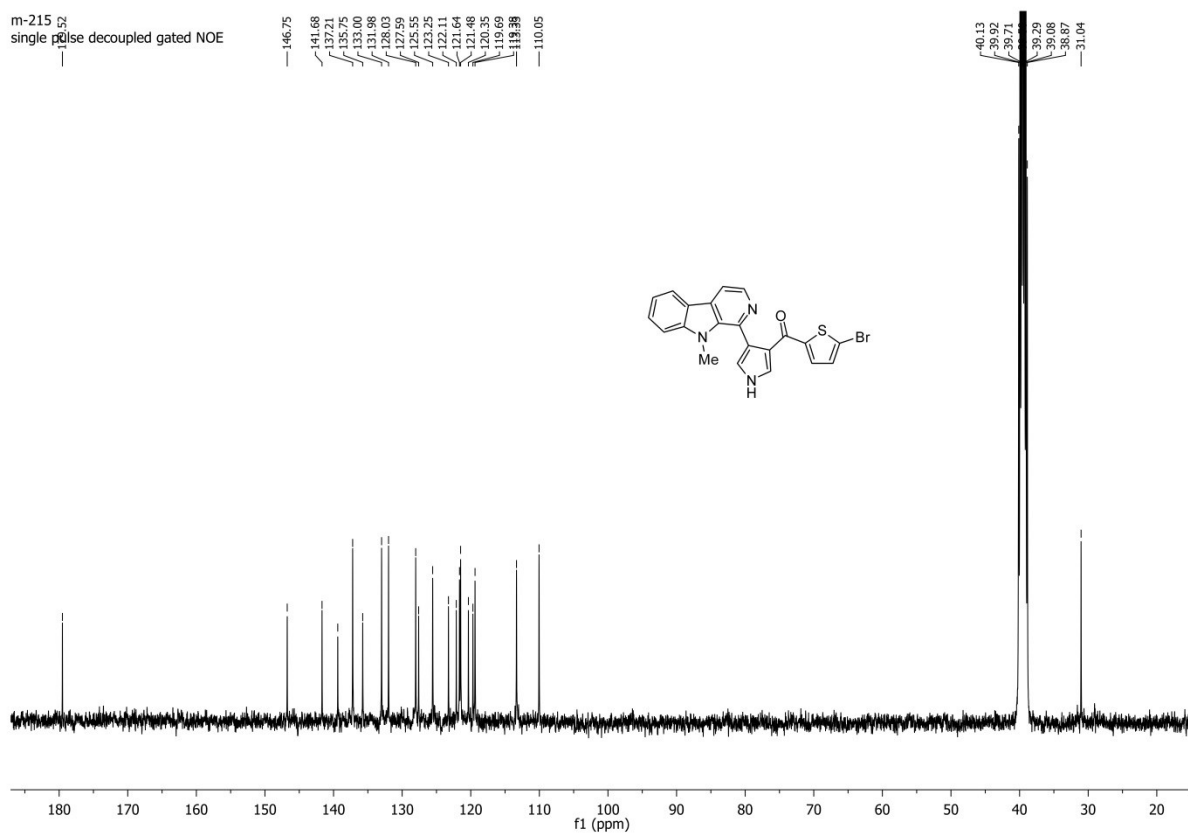

Figure S60.  $^{13}\text{C-NMR}$  spectrum of **9cJ** in  $\text{DMSO-d}_6$ .

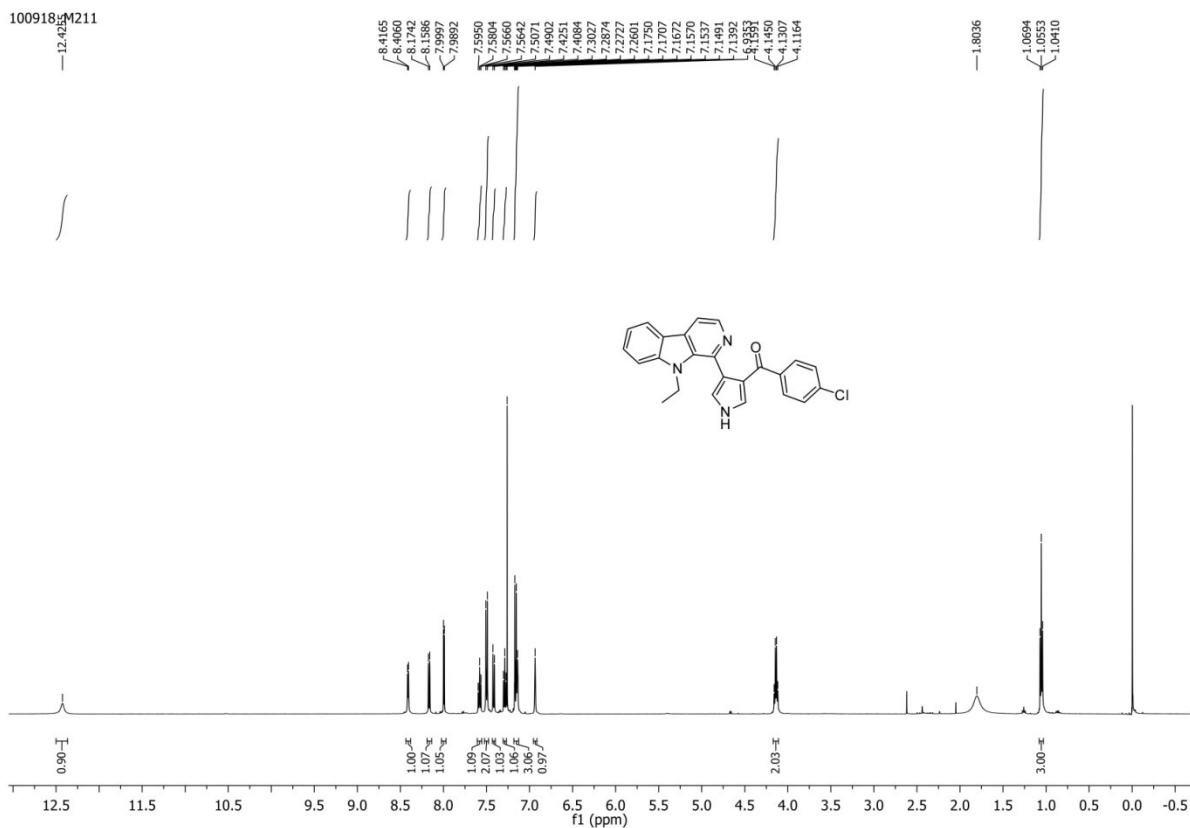

Figure S61.  $^1\text{H-NMR}$  spectrum of **10cD** in  $\text{CDCl}_3$ .

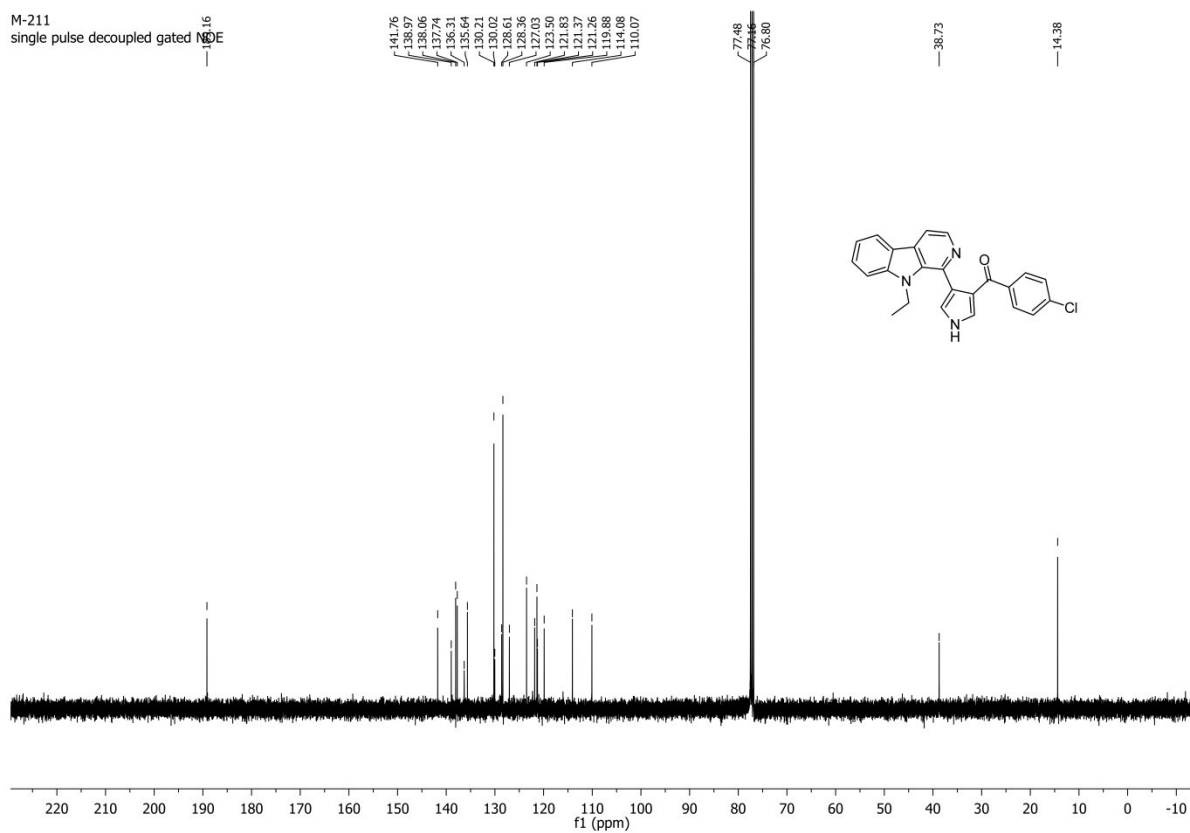

Figure S62.  $^{13}\text{C-NMR}$  spectrum of **10cD** in  $\text{CDCl}_3$ .

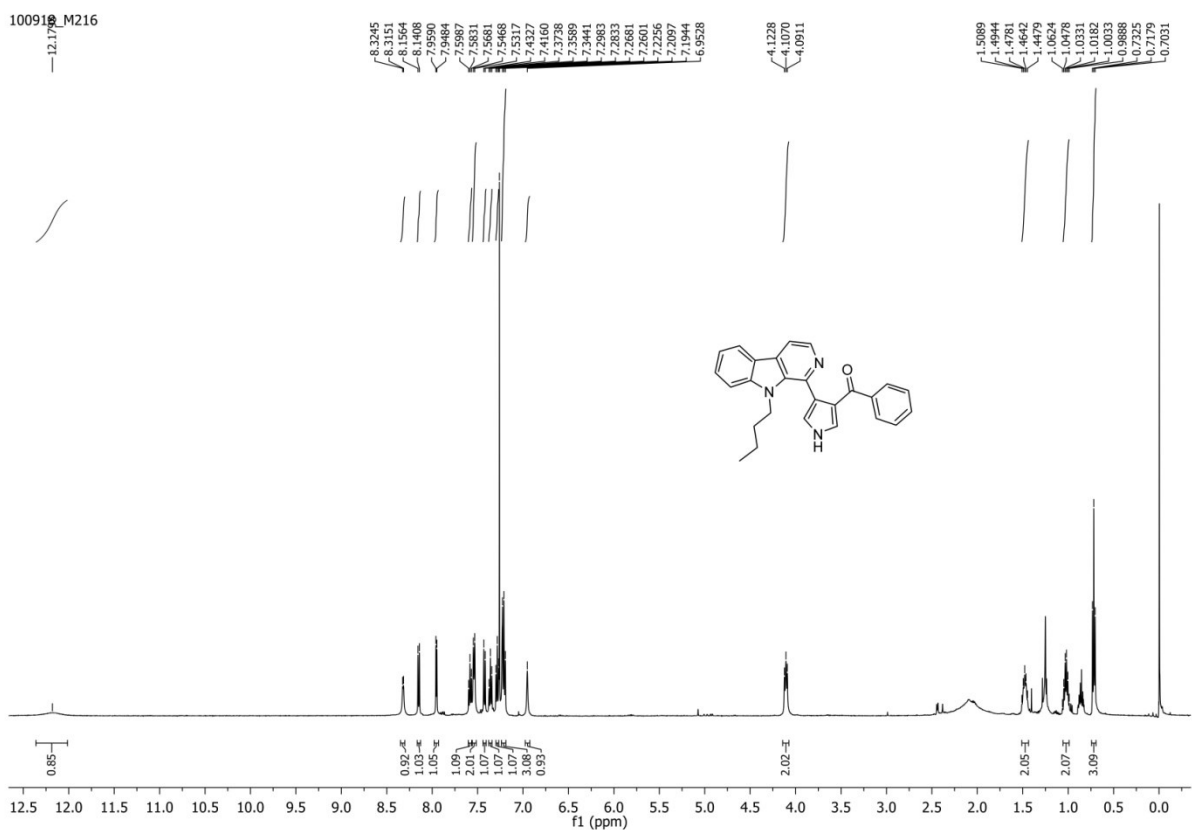

Figure S63.  $^1\text{H-NMR}$  spectrum of **11cA** in  $\text{CDCl}_3$ .

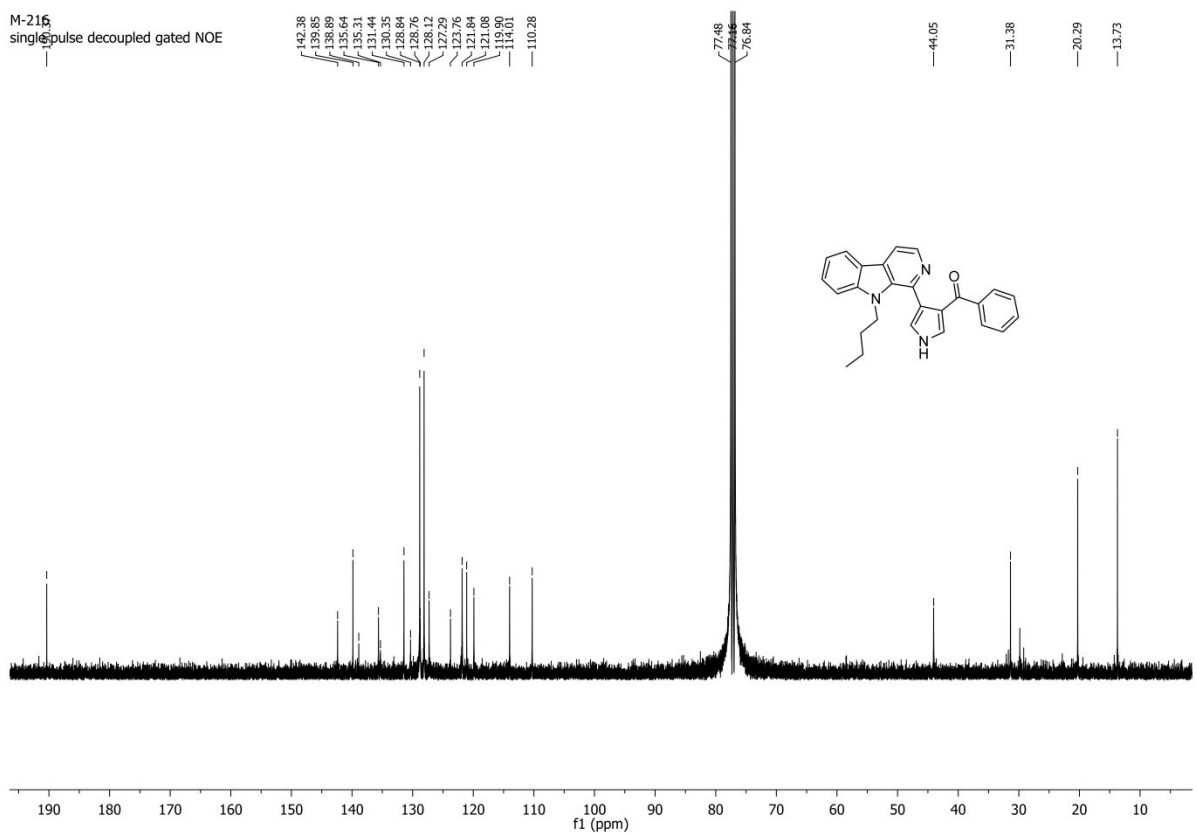

Figure S64.  $^{13}\text{C-NMR}$  spectrum of **11cA** in  $\text{CDCl}_3$ .

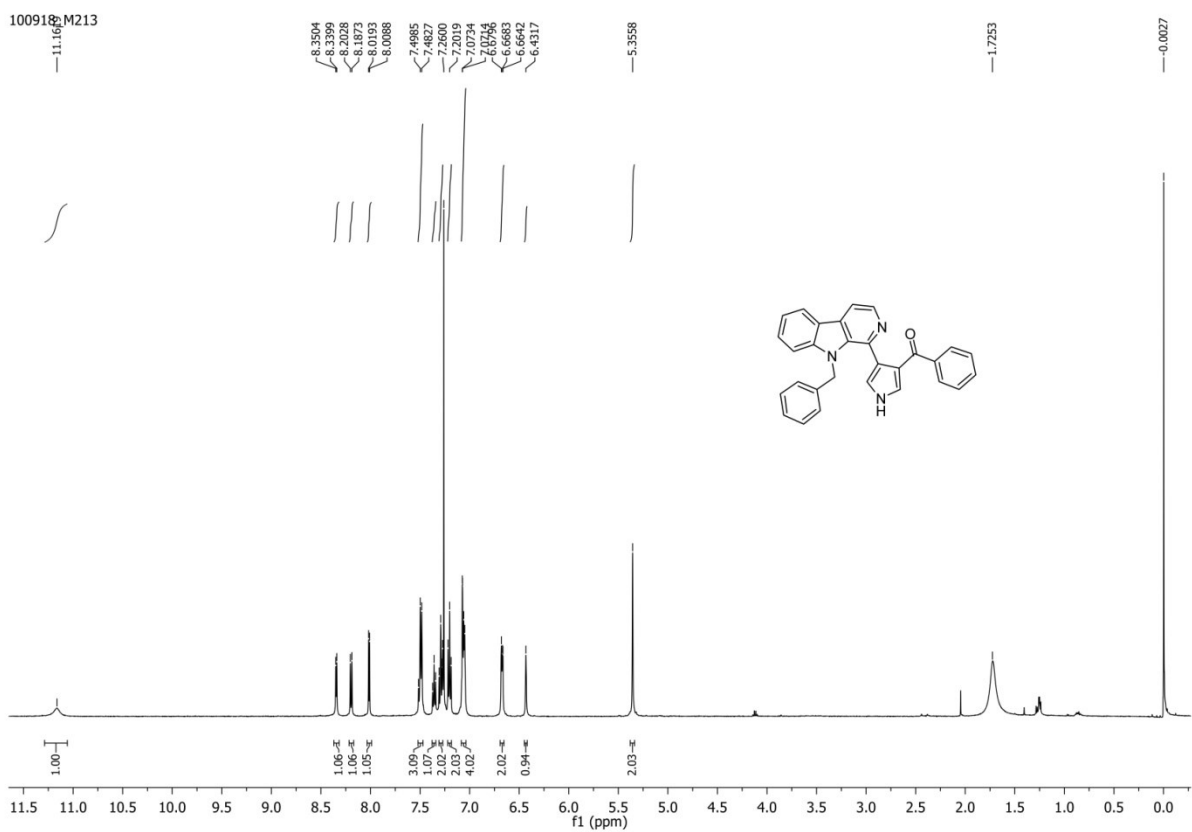

Figure S65.  $^1\text{H-NMR}$  spectrum of **12cA** in  $\text{CDCl}_3$ .

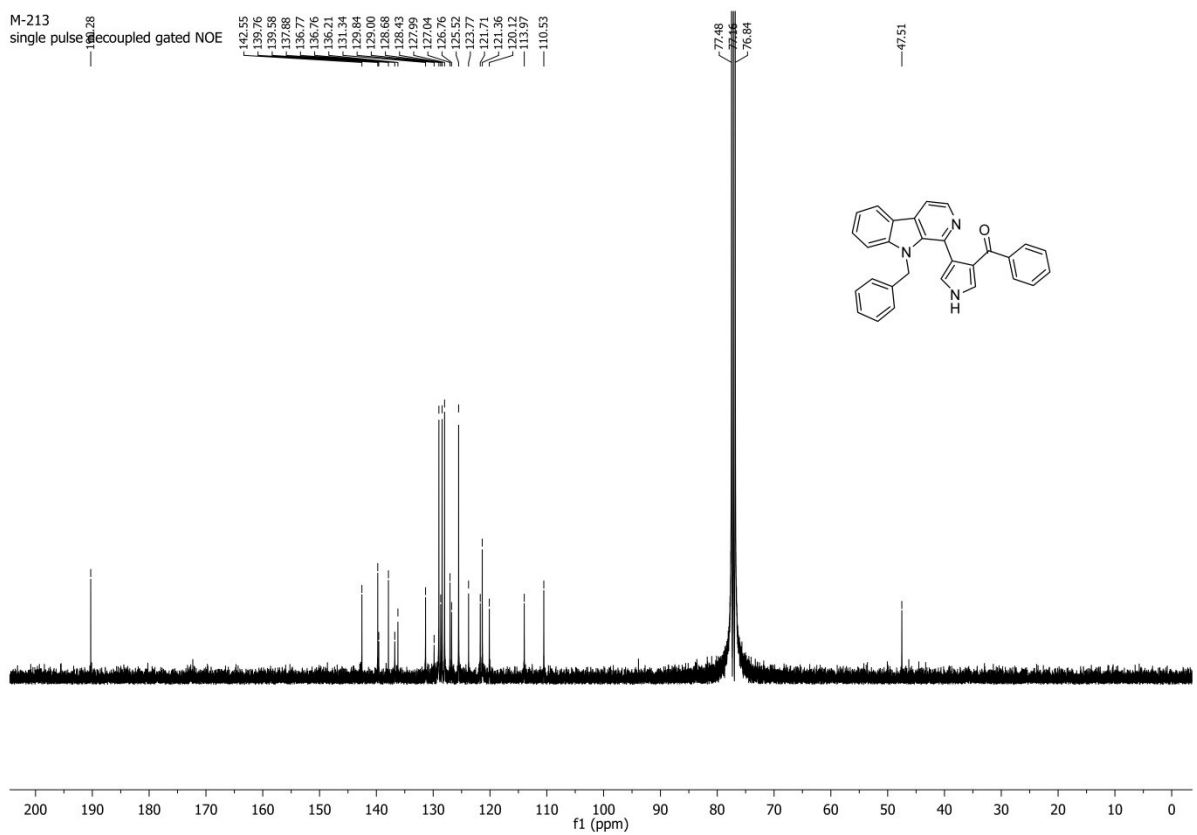

Figure S66.  $^{13}\text{C-NMR}$  spectrum of **12cA** in  $\text{CDCl}_3$ .

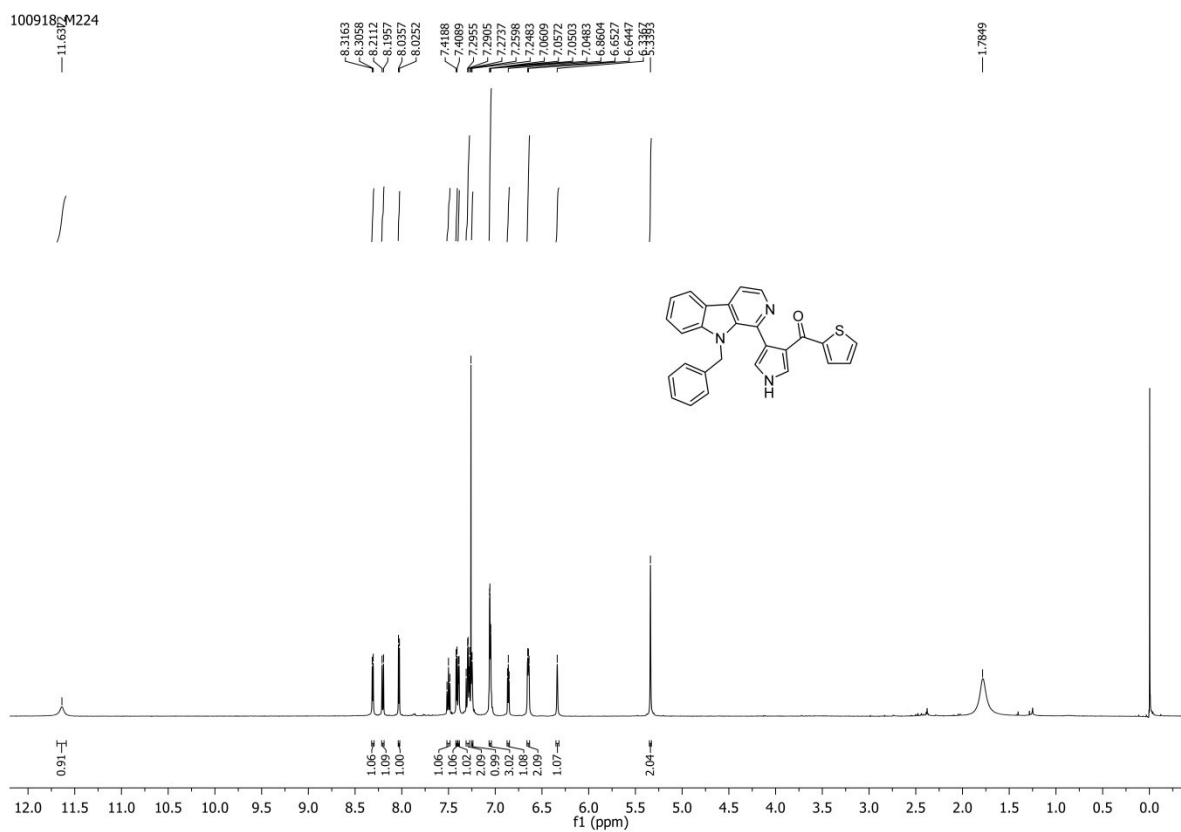

Figure S67.  $^1\text{H-NMR}$  spectrum of **12cI** in  $\text{CDCl}_3$ .

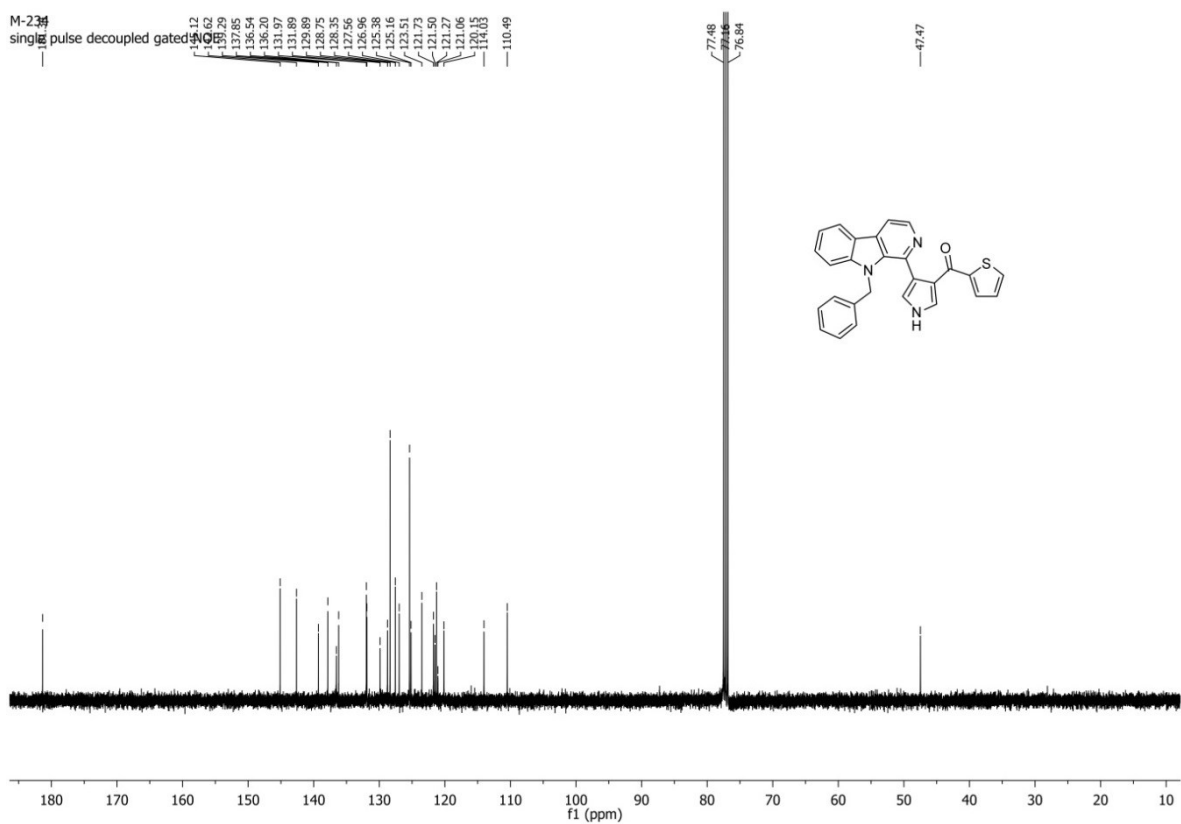

Figure S68.  $^{13}\text{C-NMR}$  spectrum of **12cI** in  $\text{CDCl}_3$ .
